# Supplementary material
Source: publisher figshare collection journal article supplement (https://acs.figshare.com/ndownloader/files/4675690)
Supplement: Supplementary file 1 [file 4675690]

data_global

#====================================================================

# 1. SUBMISSION DETAILS

_publ_contact_author   # Name and address of author for correspondence
;
      Tong, Ming-Liang
      School of Chemistry and Chemical Engineering
      Sun Yat-Sen University
      Guangzhou, 510275
      P. R. China
;
_publ_contact_author_phone '86-20-84110966'
_publ_contact_author_fax    '86-20-84112245'
_publ_contact_author_email  'tongml@mail.sysu.edu.cn'
_publ_requested_joiurnal    'Inorg. Chem.'
_publ_requested_coeditor_name ?
_publ_contact_letter
;
Dear Sir or Madam:
Please consider this CIF as a supplmentary data for a manuscript
submitted to Inorg. Chem.

Ming-Liang Tong
;
#=================================================================

# 2. PROCESSING SUMMARY (IUCr Office Use Only)

_journal_date_recd_electronic     ?

_journal_date_to_coeditor         ?
_journal_date_from_coeditor       ?
_journal_date_accepted            ?

_journal_date_printers_first      ?
_journal_date_printers_final      ?
_journal_date_proofs_out          ?
_journal_date_proofs_in           ?

_journal_coeditor_name            ?
_journal_coeditor_code            ?
_journal_coeditor_notes
 ?

_journal_techeditor_code          ?
_journal_techeditor_notes
 ?

_journal_coden_ASTM               ?
_journal_name_full                ?
_journal_year                     ?
_journal_volume                   ?
_journal_issue                    ?
_journal_page_first               ?
_journal_page_last                ?

_journal_suppl_publ_number        ?
_journal_suppl_publ_pages         ?

#=======================================================

# 3. TITLE AND AUTHOR LIST

_publ_section_title
;
 Isolation of a New Pentadentate Ligand and Step-to-Step
 Synthesis, Strucutres and Magnetic Properties of a New Family
 of Homo- and Heterotrinuclear Complexes
;

loop_
 _publ_author_name
 _publ_author_address
      'Zheng, Ling-Ling'
;     School of Chemistry and Chemical Engineering
      Sun Yat-Sen University 
      Guangzhou 510275
      P. R. China
;
      'Zhang, Wei-Xiong'
;     School of Chemistry and Chemical Engineering
      Sun Yat-Sen University 
      Guangzhou 510275
      P. R. China
;
      'Qin, Lian-Jing'
;     School of Chemistry and Chemical Engineering
      Sun Yat-Sen University 
      Guangzhou 510275
      P. R. China
;
      'Tong, Ming-Liang'
;     School of Chemistry and Chemical Engineering
      Sun Yat-Sen University 
      Guangzhou 510275
      P. R. China
;

#======================================
data_Hdcadpz 
 
_audit_creation_method            SHELXL-97 
_chemical_name_systematic 
; 
 ? 
; 
_chemical_name_common             ? 
_chemical_melting_point           ? 
_chemical_formula_moiety          ? 
_chemical_formula_sum 
 'C16 H18 N14' 
_chemical_formula_weight          406.44 
 
loop_ 
 _atom_type_symbol 
 _atom_type_description 
 _atom_type_scat_dispersion_real 
 _atom_type_scat_dispersion_imag 
 _atom_type_scat_source 
 'C'  'C'   0.0033   0.0016 
 'International Tables Vol C Tables 4.2.6.8 and 6.1.1.4' 
 'H'  'H'   0.0000   0.0000 
 'International Tables Vol C Tables 4.2.6.8 and 6.1.1.4' 
 'N'  'N'   0.0061   0.0033 
 'International Tables Vol C Tables 4.2.6.8 and 6.1.1.4' 
 
_symmetry_cell_setting            triclinic 
_symmetry_space_group_name_H-M    P-1 
 
loop_ 
 _symmetry_equiv_pos_as_xyz 
 'x, y, z' 
 '-x, -y, -z' 
 
_cell_length_a                    7.6816(18) 
_cell_length_b                    11.482(3) 
_cell_length_c                    11.716(3) 
_cell_angle_alpha                 98.347(5) 
_cell_angle_beta                  102.806(4) 
_cell_angle_gamma                 100.994(4) 
_cell_volume                      970.0(4) 
_cell_formula_units_Z             2 
_cell_measurement_temperature     293(2) 
_cell_measurement_reflns_used     ? 
_cell_measurement_theta_min       ? 
_cell_measurement_theta_max       ? 
 
_exptl_crystal_description        ? 
_exptl_crystal_colour             ? 
_exptl_crystal_size_max           ? 
_exptl_crystal_size_mid           ? 
_exptl_crystal_size_min           ? 
_exptl_crystal_density_meas       ? 
_exptl_crystal_density_diffrn     1.392 
_exptl_crystal_density_method     'not measured' 
_exptl_crystal_F_000              424 
_exptl_absorpt_coefficient_mu     0.097 
_exptl_absorpt_correction_type    ? 
_exptl_absorpt_correction_T_min   ? 
_exptl_absorpt_correction_T_max   ? 
_exptl_absorpt_process_details    ? 
 
_exptl_special_details 
; 
 ? 
; 
 
_diffrn_ambient_temperature       293(2) 
_diffrn_radiation_wavelength      0.71073 
_diffrn_radiation_type            MoK\a 
_diffrn_radiation_source          'fine-focus sealed tube' 
_diffrn_radiation_monochromator   graphite 
_diffrn_measurement_device_type   ? 
_diffrn_measurement_method        ? 
_diffrn_detector_area_resol_mean  ? 
_diffrn_standards_number          ? 
_diffrn_standards_interval_count  ? 
_diffrn_standards_interval_time   ? 
_diffrn_standards_decay_%         ? 
_diffrn_reflns_number             3881 
_diffrn_reflns_av_R_equivalents   0.0169 
_diffrn_reflns_av_sigmaI/netI     0.0468 
_diffrn_reflns_limit_h_min        -9 
_diffrn_reflns_limit_h_max        9 
_diffrn_reflns_limit_k_min        -13 
_diffrn_reflns_limit_k_max        8 
_diffrn_reflns_limit_l_min        -8 
_diffrn_reflns_limit_l_max        13 
_diffrn_reflns_theta_min          1.82 
_diffrn_reflns_theta_max          25.00 
_reflns_number_total              3087 
_reflns_number_gt                 2443 
_reflns_threshold_expression      >2sigma(I) 
 
_computing_data_collection        ? 
_computing_cell_refinement        ? 
_computing_data_reduction         ? 
_computing_structure_solution     'SHELXS-97 (Sheldrick, 1990)' 
_computing_structure_refinement   'SHELXL-97 (Sheldrick, 1997)' 
_computing_molecular_graphics     ? 
_computing_publication_material   ? 
 
_refine_special_details 
; 
 Refinement of F^2^ against ALL reflections.  The weighted R-factor wR and 
 goodness of fit S are based on F^2^, conventional R-factors R are based 
 on F, with F set to zero for negative F^2^. The threshold expression of 
 F^2^ > 2sigma(F^2^) is used only for calculating R-factors(gt) etc. and is 
 not relevant to the choice of reflections for refinement.  R-factors based 
 on F^2^ are statistically about twice as large as those based on F, and R- 
 factors based on ALL data will be even larger. 
; 
 
_refine_ls_structure_factor_coef  Fsqd  
_refine_ls_matrix_type            full 
_refine_ls_weighting_scheme       calc  
_refine_ls_weighting_details 
 'calc w=1/[\s^2^(Fo^2^)+(0.0950P)^2^+0.0260P] where P=(Fo^2^+2Fc^2^)/3' 
_atom_sites_solution_primary      direct 
_atom_sites_solution_secondary    difmap 
_atom_sites_solution_hydrogens    geom 
_refine_ls_hydrogen_treatment     mixed 
_refine_ls_extinction_method      none 
_refine_ls_extinction_coef        ? 
_refine_ls_number_reflns          3087 
_refine_ls_number_parameters      295 
_refine_ls_number_restraints      6 
_refine_ls_R_factor_all           0.0672 
_refine_ls_R_factor_gt            0.0545 
_refine_ls_wR_factor_ref          0.1591 
_refine_ls_wR_factor_gt           0.1487 
_refine_ls_goodness_of_fit_ref    1.040 
_refine_ls_restrained_S_all       1.039 
_refine_ls_shift/su_max           0.000 
_refine_ls_shift/su_mean          0.000 
 
loop_ 
 _atom_site_label 
 _atom_site_type_symbol 
 _atom_site_fract_x 
 _atom_site_fract_y 
 _atom_site_fract_z 
 _atom_site_U_iso_or_equiv 
 _atom_site_adp_type 
 _atom_site_occupancy 
 _atom_site_symmetry_multiplicity 
 _atom_site_calc_flag 
 _atom_site_refinement_flags 
 _atom_site_disorder_assembly 
 _atom_site_disorder_group 
N1 N 0.6296(3) 0.7467(2) 0.3039(2) 0.0629(6) Uani 1 1 d D . . 
H1N H 0.705(3) 0.707(2) 0.344(2) 0.078(9) Uiso 1 1 d D . . 
N2 N 0.6458(3) 0.93691(17) 0.24441(17) 0.0468(5) Uani 1 1 d . . . 
N3 N 0.3520(3) 0.8071(2) 0.1664(2) 0.0572(6) Uani 1 1 d D . . 
H3A H 0.2341(17) 0.788(2) 0.125(2) 0.067(8) Uiso 1 1 d D . . 
H3B H 0.386(3) 0.7515(18) 0.208(2) 0.065(8) Uiso 1 1 d D . . 
N4 N 0.9111(3) 0.89028(16) 0.33824(16) 0.0435(5) Uani 1 1 d . . . 
N5 N 1.0077(3) 0.82320(19) 0.40217(18) 0.0547(6) Uani 1 1 d . . . 
N6 N 0.4128(2) 1.00081(17) 0.13089(17) 0.0436(5) Uani 1 1 d . . . 
N7 N 0.2373(3) 0.97979(18) 0.06211(19) 0.0523(6) Uani 1 1 d . . . 
N8 N 1.0499(3) 1.3135(2) 0.4050(2) 0.0559(6) Uani 1 1 d D . . 
H8A H 1.050(4) 1.299(2) 0.4783(13) 0.066(8) Uiso 1 1 d D . . 
H8B H 0.988(3) 1.2540(18) 0.3436(17) 0.071(9) Uiso 1 1 d D . . 
N9 N 1.1598(3) 1.43335(17) 0.27726(17) 0.0453(5) Uani 1 1 d . . . 
N10 N 0.9588(3) 1.2476(2) 0.1695(2) 0.0589(6) Uani 1 1 d D . . 
H10N H 0.923(3) 1.2037(19) 0.0951(12) 0.058(8) Uiso 1 1 d D . . 
N11 N 1.2457(3) 1.50080(17) 0.47956(16) 0.0449(5) Uani 1 1 d . . . 
N12 N 1.2426(3) 1.4857(2) 0.59219(18) 0.0575(6) Uani 1 1 d . . . 
N13 N 1.1236(2) 1.38311(16) 0.07567(16) 0.0416(5) Uani 1 1 d . . . 
N14 N 1.0356(3) 1.31804(18) -0.03597(17) 0.0500(5) Uani 1 1 d . . . 
C1 C 1.0214(4) 0.9902(2) 0.3249(2) 0.0558(7) Uani 1 1 d . . . 
H1 H 0.9853 1.0485 0.2836 0.067 Uiso 1 1 calc R . . 
C2 C 1.1949(4) 0.9905(2) 0.3825(3) 0.0660(8) Uani 1 1 d . . . 
H2 H 1.3016 1.0481 0.3894 0.079 Uiso 1 1 calc R . . 
C3 C 1.1784(4) 0.8864(3) 0.4286(3) 0.0618(7) Uani 1 1 d . . . 
H3 H 1.2772 0.8633 0.4737 0.074 Uiso 1 1 calc R . . 
C4 C 0.7160(3) 0.8496(2) 0.2946(2) 0.0460(6) Uani 1 1 d . . . 
C5 C 0.4731(3) 0.9090(2) 0.1844(2) 0.0437(6) Uani 1 1 d . . . 
C6 C 0.5104(3) 1.1132(2) 0.1337(2) 0.0481(6) Uani 1 1 d . . . 
H6 H 0.6324 1.1467 0.1743 0.058 Uiso 1 1 calc R . . 
C7 C 0.3953(3) 1.1670(2) 0.0659(2) 0.0524(6) Uani 1 1 d . . . 
H7 H 0.4215 1.2449 0.0509 0.063 Uiso 1 1 calc R . . 
C8 C 0.2304(3) 1.0815(2) 0.0236(2) 0.0514(6) Uani 1 1 d . . . 
H8 H 0.1265 1.0944 -0.0264 0.062 Uiso 1 1 calc R . . 
C9 C 1.3609(4) 1.6058(2) 0.4795(2) 0.0536(7) Uani 1 1 d . . . 
H9 H 1.3854 1.6342 0.4130 0.064 Uiso 1 1 calc R . . 
C10 C 1.4337(4) 1.6617(2) 0.5954(2) 0.0600(7) Uani 1 1 d . . . 
H10 H 1.5168 1.7362 0.6248 0.072 Uiso 1 1 calc R . . 
C11 C 1.3575(4) 1.5841(2) 0.6601(2) 0.0647(8) Uani 1 1 d . . . 
H11 H 1.3845 1.5996 0.7430 0.078 Uiso 1 1 calc R . . 
C12 C 1.1439(3) 1.4094(2) 0.3806(2) 0.0437(6) Uani 1 1 d . . . 
C13 C 1.0706(3) 1.3462(2) 0.1770(2) 0.0437(6) Uani 1 1 d . . . 
C14 C 1.2549(3) 1.4778(2) 0.0727(2) 0.0522(6) Uani 1 1 d . . . 
H14 H 1.3327 1.5341 0.1378 0.063 Uiso 1 1 calc R . . 
C15 C 1.2513(4) 1.4749(3) -0.0434(2) 0.0644(8) Uani 1 1 d . . . 
H15 H 1.3261 1.5287 -0.0743 0.077 Uiso 1 1 calc R . . 
C16 C 1.1138(3) 1.3760(2) -0.1070(2) 0.0555(7) Uani 1 1 d . . . 
H16 H 1.0807 1.3533 -0.1897 0.067 Uiso 1 1 calc R . . 
 
loop_ 
 _atom_site_aniso_label 
 _atom_site_aniso_U_11 
 _atom_site_aniso_U_22 
 _atom_site_aniso_U_33 
 _atom_site_aniso_U_23 
 _atom_site_aniso_U_13 
 _atom_site_aniso_U_12 
N1 0.0537(13) 0.0531(14) 0.0783(16) 0.0321(12) 0.0038(11) 0.0045(11) 
N2 0.0460(11) 0.0413(11) 0.0476(12) 0.0104(9) 0.0019(9) 0.0077(9) 
N3 0.0458(13) 0.0461(13) 0.0694(15) 0.0165(12) 0.0000(11) -0.0005(11) 
N4 0.0469(11) 0.0397(11) 0.0413(11) 0.0114(9) 0.0046(8) 0.0091(9) 
N5 0.0529(13) 0.0542(13) 0.0545(13) 0.0201(11) 0.0019(10) 0.0131(11) 
N6 0.0393(10) 0.0402(11) 0.0459(11) 0.0065(9) 0.0036(8) 0.0066(9) 
N7 0.0400(11) 0.0499(13) 0.0601(13) 0.0125(11) 0.0004(9) 0.0073(10) 
N8 0.0619(14) 0.0499(14) 0.0483(14) 0.0155(12) 0.0080(11) -0.0026(11) 
N9 0.0477(11) 0.0402(11) 0.0432(11) 0.0088(9) 0.0066(9) 0.0043(9) 
N10 0.0623(14) 0.0504(14) 0.0499(14) 0.0051(11) 0.0096(11) -0.0115(11) 
N11 0.0496(12) 0.0413(12) 0.0417(11) 0.0103(9) 0.0077(9) 0.0085(10) 
N12 0.0713(15) 0.0550(14) 0.0434(12) 0.0126(11) 0.0103(10) 0.0105(12) 
N13 0.0414(11) 0.0371(11) 0.0429(11) 0.0054(9) 0.0077(8) 0.0066(9) 
N14 0.0512(12) 0.0484(13) 0.0432(12) 0.0022(10) 0.0041(9) 0.0083(10) 
C1 0.0545(15) 0.0413(14) 0.0684(18) 0.0157(13) 0.0087(13) 0.0078(12) 
C2 0.0511(16) 0.0516(16) 0.089(2) 0.0180(16) 0.0096(14) 0.0028(13) 
C3 0.0480(16) 0.0651(18) 0.0670(18) 0.0181(14) 0.0010(12) 0.0125(14) 
C4 0.0464(13) 0.0455(14) 0.0430(13) 0.0117(11) 0.0059(10) 0.0072(11) 
C5 0.0469(14) 0.0386(13) 0.0422(13) 0.0067(11) 0.0066(10) 0.0085(11) 
C6 0.0428(13) 0.0382(14) 0.0543(15) 0.0024(12) 0.0041(11) 0.0022(11) 
C7 0.0543(15) 0.0377(13) 0.0625(17) 0.0105(12) 0.0089(12) 0.0109(12) 
C8 0.0455(14) 0.0483(15) 0.0575(16) 0.0105(13) 0.0050(11) 0.0136(12) 
C9 0.0629(16) 0.0444(15) 0.0519(15) 0.0105(13) 0.0135(12) 0.0092(13) 
C10 0.0666(17) 0.0452(15) 0.0573(17) 0.0023(14) 0.0062(13) 0.0040(13) 
C11 0.083(2) 0.0593(18) 0.0422(15) 0.0063(14) 0.0036(14) 0.0109(16) 
C12 0.0436(13) 0.0381(13) 0.0473(14) 0.0108(11) 0.0058(10) 0.0097(11) 
C13 0.0424(13) 0.0404(14) 0.0466(14) 0.0109(12) 0.0071(10) 0.0083(11) 
C14 0.0523(15) 0.0420(14) 0.0560(16) 0.0095(12) 0.0126(12) -0.0024(12) 
C15 0.0667(18) 0.0636(18) 0.0602(18) 0.0185(15) 0.0217(14) -0.0029(15) 
C16 0.0599(16) 0.0659(18) 0.0425(14) 0.0112(14) 0.0142(12) 0.0169(14) 
 
_geom_special_details 
; 
 All esds (except the esd in the dihedral angle between two l.s. planes) 
 are estimated using the full covariance matrix.  The cell esds are taken 
 into account individually in the estimation of esds in distances, angles 
 and torsion angles; correlations between esds in cell parameters are only 
 used when they are defined by crystal symmetry.  An approximate (isotropic) 
 treatment of cell esds is used for estimating esds involving l.s. planes. 
; 
 
loop_ 
 _geom_bond_atom_site_label_1 
 _geom_bond_atom_site_label_2 
 _geom_bond_distance 
 _geom_bond_site_symmetry_2 
 _geom_bond_publ_flag 
N1 C4 1.272(3) . ? 
N1 H1N 0.899(10) . ? 
N2 C5 1.309(3) . ? 
N2 C4 1.370(3) . ? 
N3 C5 1.306(3) . ? 
N3 H3A 0.896(10) . ? 
N3 H3B 0.900(10) . ? 
N4 C1 1.341(3) . ? 
N4 N5 1.358(3) . ? 
N4 C4 1.432(3) . ? 
N5 C3 1.316(3) . ? 
N6 C6 1.354(3) . ? 
N6 N7 1.365(3) . ? 
N6 C5 1.403(3) . ? 
N7 C8 1.318(3) . ? 
N8 C12 1.302(3) . ? 
N8 H8A 0.896(10) . ? 
N8 H8B 0.891(10) . ? 
N9 C12 1.306(3) . ? 
N9 C13 1.375(3) . ? 
N10 C13 1.262(3) . ? 
N10 H10N 0.896(10) . ? 
N11 C9 1.353(3) . ? 
N11 N12 1.360(3) . ? 
N11 C12 1.410(3) . ? 
N12 C11 1.317(3) . ? 
N13 C14 1.344(3) . ? 
N13 N14 1.363(3) . ? 
N13 C13 1.432(3) . ? 
N14 C16 1.314(3) . ? 
C1 C2 1.353(4) . ? 
C1 H1 0.9300 . ? 
C2 C3 1.377(4) . ? 
C2 H2 0.9300 . ? 
C3 H3 0.9300 . ? 
C6 C7 1.354(3) . ? 
C6 H6 0.9300 . ? 
C7 C8 1.386(3) . ? 
C7 H7 0.9300 . ? 
C8 H8 0.9300 . ? 
C9 C10 1.358(3) . ? 
C9 H9 0.9300 . ? 
C10 C11 1.380(4) . ? 
C10 H10 0.9300 . ? 
C11 H11 0.9300 . ? 
C14 C15 1.350(4) . ? 
C14 H14 0.9300 . ? 
C15 C16 1.381(4) . ? 
C15 H15 0.9300 . ? 
C16 H16 0.9300 . ? 
 
loop_ 
 _geom_angle_atom_site_label_1 
 _geom_angle_atom_site_label_2 
 _geom_angle_atom_site_label_3 
 _geom_angle 
 _geom_angle_site_symmetry_1 
 _geom_angle_site_symmetry_3 
 _geom_angle_publ_flag 
C4 N1 H1N 111.9(19) . . ? 
C5 N2 C4 118.1(2) . . ? 
C5 N3 H3A 128.5(17) . . ? 
C5 N3 H3B 116.5(17) . . ? 
H3A N3 H3B 115(2) . . ? 
C1 N4 N5 111.49(19) . . ? 
C1 N4 C4 128.81(19) . . ? 
N5 N4 C4 119.70(18) . . ? 
C3 N5 N4 103.68(19) . . ? 
C6 N6 N7 111.80(18) . . ? 
C6 N6 C5 128.21(19) . . ? 
N7 N6 C5 119.94(19) . . ? 
C8 N7 N6 103.75(19) . . ? 
C12 N8 H8A 125.8(18) . . ? 
C12 N8 H8B 116.9(18) . . ? 
H8A N8 H8B 117(3) . . ? 
C12 N9 C13 117.9(2) . . ? 
C13 N10 H10N 111.8(17) . . ? 
C9 N11 N12 111.9(2) . . ? 
C9 N11 C12 127.8(2) . . ? 
N12 N11 C12 120.22(19) . . ? 
C11 N12 N11 103.5(2) . . ? 
C14 N13 N14 111.63(19) . . ? 
C14 N13 C13 128.7(2) . . ? 
N14 N13 C13 119.64(19) . . ? 
C16 N14 N13 104.3(2) . . ? 
N4 C1 C2 107.4(2) . . ? 
N4 C1 H1 126.3 . . ? 
C2 C1 H1 126.3 . . ? 
C1 C2 C3 104.7(2) . . ? 
C1 C2 H2 127.7 . . ? 
C3 C2 H2 127.7 . . ? 
N5 C3 C2 112.8(2) . . ? 
N5 C3 H3 123.6 . . ? 
C2 C3 H3 123.6 . . ? 
N1 C4 N2 128.1(2) . . ? 
N1 C4 N4 122.3(2) . . ? 
N2 C4 N4 109.59(19) . . ? 
N3 C5 N2 128.7(2) . . ? 
N3 C5 N6 116.3(2) . . ? 
N2 C5 N6 115.0(2) . . ? 
N6 C6 C7 106.5(2) . . ? 
N6 C6 H6 126.7 . . ? 
C7 C6 H6 126.7 . . ? 
C6 C7 C8 105.5(2) . . ? 
C6 C7 H7 127.2 . . ? 
C8 C7 H7 127.2 . . ? 
N7 C8 C7 112.4(2) . . ? 
N7 C8 H8 123.8 . . ? 
C7 C8 H8 123.8 . . ? 
N11 C9 C10 106.7(2) . . ? 
N11 C9 H9 126.7 . . ? 
C10 C9 H9 126.7 . . ? 
C9 C10 C11 104.9(2) . . ? 
C9 C10 H10 127.5 . . ? 
C11 C10 H10 127.5 . . ? 
N12 C11 C10 113.0(2) . . ? 
N12 C11 H11 123.5 . . ? 
C10 C11 H11 123.5 . . ? 
N8 C12 N9 129.4(2) . . ? 
N8 C12 N11 115.9(2) . . ? 
N9 C12 N11 114.7(2) . . ? 
N10 C13 N9 128.1(2) . . ? 
N10 C13 N13 122.7(2) . . ? 
N9 C13 N13 109.24(19) . . ? 
N13 C14 C15 106.4(2) . . ? 
N13 C14 H14 126.8 . . ? 
C15 C14 H14 126.8 . . ? 
C14 C15 C16 106.1(2) . . ? 
C14 C15 H15 127.0 . . ? 
C16 C15 H15 127.0 . . ? 
N14 C16 C15 111.6(2) . . ? 
N14 C16 H16 124.2 . . ? 
C15 C16 H16 124.2 . . ? 
 
loop_ 
 _geom_hbond_atom_site_label_D 
 _geom_hbond_atom_site_label_H 
 _geom_hbond_atom_site_label_A 
 _geom_hbond_distance_DH 
 _geom_hbond_distance_HA 
 _geom_hbond_distance_DA 
 _geom_hbond_angle_DHA 
 _geom_hbond_site_symmetry_A 
N1 H1N N5  0.899(10) 2.35(3) 2.790(3) 110(2) . 
N1 H1N N12  0.899(10) 2.508(17) 3.314(3) 149(2) 2_776 
N3 H3A N14  0.896(10) 2.139(13) 2.997(3) 160(2) 2_675 
N3 H3B N1  0.900(10) 1.98(2) 2.644(3) 130(2) . 
N8 H8A N5  0.896(10) 2.178(16) 2.995(3) 151(2) 2_776 
N8 H8B N10  0.891(10) 1.99(2) 2.648(3) 129(2) . 
N10 H10N N7  0.896(10) 2.496(14) 3.329(3) 155(2) 2_675 
 
_diffrn_measured_fraction_theta_max    0.905 
_diffrn_reflns_theta_full              25.00 
_diffrn_measured_fraction_theta_full   0.905 
_refine_diff_density_max    0.206 
_refine_diff_density_min   -0.206 
_refine_diff_density_rms    0.053 


#===============================END

data_[H2dcadpz]+[clO4]-
 
_audit_creation_method            SHELXL-97 
_chemical_name_systematic 
; 
 ? 
; 
_chemical_name_common             ? 
_chemical_melting_point           ? 
_chemical_formula_moiety          ? 
_chemical_formula_sum 
 'C8 H10 Cl N7 O4' 
_chemical_formula_weight          303.68 
 
loop_ 
 _atom_type_symbol 
 _atom_type_description 
 _atom_type_scat_dispersion_real 
 _atom_type_scat_dispersion_imag 
 _atom_type_scat_source 
 'C'  'C'   0.0033   0.0016 
 'International Tables Vol C Tables 4.2.6.8 and 6.1.1.4' 
 'H'  'H'   0.0000   0.0000 
 'International Tables Vol C Tables 4.2.6.8 and 6.1.1.4' 
 'N'  'N'   0.0061   0.0033 
 'International Tables Vol C Tables 4.2.6.8 and 6.1.1.4' 
 'O'  'O'   0.0106   0.0060 
 'International Tables Vol C Tables 4.2.6.8 and 6.1.1.4' 
 'Cl'  'Cl'   0.1484   0.1585 
 'International Tables Vol C Tables 4.2.6.8 and 6.1.1.4' 
 
_symmetry_cell_setting            Orthorhombic 
_symmetry_space_group_name_H-M    Pccn 
 
loop_ 
 _symmetry_equiv_pos_as_xyz 
 'x, y, z' 
 '-x+1/2, -y+1/2, z' 
 '-x, y+1/2, -z+1/2' 
 'x+1/2, -y, -z+1/2' 
 '-x, -y, -z' 
 'x-1/2, y-1/2, -z' 
 'x, -y-1/2, z-1/2' 
 '-x-1/2, y, z-1/2' 
 
_cell_length_a                    5.6286(7) 
_cell_length_b                    13.1374(16) 
_cell_length_c                    17.198(2) 
_cell_angle_alpha                 90.00 
_cell_angle_beta                  90.00 
_cell_angle_gamma                 90.00 
_cell_volume                      1271.7(3) 
_cell_formula_units_Z             4 
_cell_measurement_temperature     293(2) 
_cell_measurement_reflns_used     ? 
_cell_measurement_theta_min       ? 
_cell_measurement_theta_max       ? 
 
_exptl_crystal_description        ? 
_exptl_crystal_colour             ? 
_exptl_crystal_size_max           0.27 
_exptl_crystal_size_mid           0.16 
_exptl_crystal_size_min           0.09 
_exptl_crystal_density_meas       ? 
_exptl_crystal_density_diffrn     1.586 
_exptl_crystal_density_method     'not measured' 
_exptl_crystal_F_000              624 
_exptl_absorpt_coefficient_mu     0.328 
_exptl_absorpt_correction_type    ? 
_exptl_absorpt_correction_T_min   0.9166 
_exptl_absorpt_correction_T_max   0.9711 
_exptl_absorpt_process_details    ? 
 
_exptl_special_details 
; 
 ? 
; 
 
_diffrn_ambient_temperature       293(2) 
_diffrn_radiation_wavelength      0.71073 
_diffrn_radiation_type            MoK\a 
_diffrn_radiation_source          'fine-focus sealed tube' 
_diffrn_radiation_monochromator   graphite 
_diffrn_measurement_device_type   ? 
_diffrn_measurement_method        ? 
_diffrn_detector_area_resol_mean  ? 
_diffrn_standards_number          ? 
_diffrn_standards_interval_count  ? 
_diffrn_standards_interval_time   ? 
_diffrn_standards_decay_%         ? 
_diffrn_reflns_number             5634 
_diffrn_reflns_av_R_equivalents   0.0219 
_diffrn_reflns_av_sigmaI/netI     0.0206 
_diffrn_reflns_limit_h_min        -6 
_diffrn_reflns_limit_h_max        7 
_diffrn_reflns_limit_k_min        -16 
_diffrn_reflns_limit_k_max        8 
_diffrn_reflns_limit_l_min        -21 
_diffrn_reflns_limit_l_max        21 
_diffrn_reflns_theta_min          2.37 
_diffrn_reflns_theta_max          27.00 
_reflns_number_total              1371 
_reflns_number_gt                 1152 
_reflns_threshold_expression      >2sigma(I) 
 
_computing_data_collection        ? 
_computing_cell_refinement        ? 
_computing_data_reduction         ? 
_computing_structure_solution     'SHELXS-97 (Sheldrick, 1990)' 
_computing_structure_refinement   'SHELXL-97 (Sheldrick, 1997)' 
_computing_molecular_graphics     ? 
_computing_publication_material   ? 
 
_refine_special_details 
; 
 Refinement of F^2^ against ALL reflections.  The weighted R-factor wR and 
 goodness of fit S are based on F^2^, conventional R-factors R are based 
 on F, with F set to zero for negative F^2^. The threshold expression of 
 F^2^ > 2sigma(F^2^) is used only for calculating R-factors(gt) etc. and is 
 not relevant to the choice of reflections for refinement.  R-factors based 
 on F^2^ are statistically about twice as large as those based on F, and R- 
 factors based on ALL data will be even larger. 
; 
 
_refine_ls_structure_factor_coef  Fsqd  
_refine_ls_matrix_type            full 
_refine_ls_weighting_scheme       calc  
_refine_ls_weighting_details 
 'calc w=1/[\s^2^(Fo^2^)+(0.0742P)^2^+1.6300P] where P=(Fo^2^+2Fc^2^)/3' 
_atom_sites_solution_primary      direct 
_atom_sites_solution_secondary    difmap 
_atom_sites_solution_hydrogens    geom 
_refine_ls_hydrogen_treatment     mixed 
_refine_ls_extinction_method      none 
_refine_ls_extinction_coef        ? 
_refine_ls_number_reflns          1371 
_refine_ls_number_parameters      118 
_refine_ls_number_restraints      36 
_refine_ls_R_factor_all           0.0775 
_refine_ls_R_factor_gt            0.0683 
_refine_ls_wR_factor_ref          0.1805 
_refine_ls_wR_factor_gt           0.1732 
_refine_ls_goodness_of_fit_ref    1.067 
_refine_ls_restrained_S_all       1.232 
_refine_ls_shift/su_max           0.000 
_refine_ls_shift/su_mean          0.000 
 
loop_ 
 _atom_site_label 
 _atom_site_type_symbol 
 _atom_site_fract_x 
 _atom_site_fract_y 
 _atom_site_fract_z 
 _atom_site_U_iso_or_equiv 
 _atom_site_adp_type 
 _atom_site_occupancy 
 _atom_site_symmetry_multiplicity 
 _atom_site_calc_flag 
 _atom_site_refinement_flags 
 _atom_site_disorder_assembly 
 _atom_site_disorder_group 
N1 N 1.2241(7) 0.6330(3) 0.51929(19) 0.0684(11) Uani 1 1 d D . . 
H1A H 1.337(6) 0.661(3) 0.490(2) 0.080(14) Uiso 1 1 d D . . 
H1B H 1.154(8) 0.576(2) 0.502(2) 0.081(14) Uiso 1 1 d D . . 
N2 N 1.2500 0.7500 0.6218(2) 0.0540(11) Uani 1 2 d S . . 
N3 N 0.9884(5) 0.61781(19) 0.62715(15) 0.0445(7) Uani 1 1 d . . . 
N4 N 0.8776(6) 0.5346(2) 0.59556(17) 0.0545(8) Uani 1 1 d . . . 
C1 C 1.1596(7) 0.6703(3) 0.58584(19) 0.0481(8) Uani 1 1 d . . . 
C2 C 0.9004(7) 0.6410(2) 0.6985(2) 0.0501(9) Uani 1 1 d . . . 
H2 H 0.9494 0.6941 0.7305 0.060 Uiso 1 1 calc R . . 
C3 C 0.7292(7) 0.5727(3) 0.7141(2) 0.0597(10) Uani 1 1 d . . . 
H3 H 0.6357 0.5686 0.7586 0.072 Uiso 1 1 calc R . . 
C4 C 0.7224(7) 0.5094(3) 0.6489(2) 0.0591(10) Uani 1 1 d . . . 
H4 H 0.6181 0.4549 0.6439 0.071 Uiso 1 1 calc R . . 
Cl1 Cl 1.7500 0.7500 0.40933(8) 0.0652(5) Uani 1 2 d SD . . 
O1 O 1.7037(17) 0.7095(7) 0.4834(5) 0.140(4) Uani 0.50 1 d PDU . . 
O2 O 1.926(2) 0.7052(9) 0.3613(7) 0.119(4) Uani 0.50 1 d PDU . . 
O3 O 1.521(2) 0.7533(10) 0.3735(7) 0.119(4) Uani 0.50 1 d PDU . . 
O4 O 1.8087(18) 0.8535(6) 0.4246(6) 0.125(3) Uani 0.50 1 d PDU . . 
 
loop_ 
 _atom_site_aniso_label 
 _atom_site_aniso_U_11 
 _atom_site_aniso_U_22 
 _atom_site_aniso_U_33 
 _atom_site_aniso_U_23 
 _atom_site_aniso_U_13 
 _atom_site_aniso_U_12 
N1 0.075(2) 0.074(2) 0.0554(18) -0.0153(16) 0.0183(17) -0.0432(19) 
N2 0.064(3) 0.052(2) 0.046(2) 0.000 0.000 -0.023(2) 
N3 0.0490(16) 0.0384(13) 0.0460(15) 0.0034(11) 0.0014(12) -0.0087(12) 
N4 0.0626(19) 0.0477(15) 0.0533(16) -0.0013(12) 0.0042(14) -0.0214(14) 
C1 0.0500(19) 0.0496(18) 0.0448(17) 0.0028(14) -0.0014(15) -0.0131(16) 
C2 0.058(2) 0.0408(16) 0.0515(18) 0.0015(14) 0.0087(16) -0.0010(15) 
C3 0.065(2) 0.0517(19) 0.062(2) 0.0039(17) 0.0229(19) -0.0055(18) 
C4 0.060(2) 0.052(2) 0.065(2) 0.0056(17) 0.0095(19) -0.0194(18) 
Cl1 0.0548(8) 0.0765(10) 0.0642(9) 0.000 0.000 -0.0147(7) 
O1 0.099(6) 0.177(9) 0.143(6) 0.102(6) 0.034(6) 0.022(6) 
O2 0.111(8) 0.135(8) 0.111(6) -0.028(6) 0.000(6) 0.039(7) 
O3 0.089(6) 0.142(8) 0.127(8) -0.039(6) -0.040(6) -0.035(6) 
O4 0.125(7) 0.101(5) 0.149(7) -0.018(5) 0.014(6) -0.062(5) 
 
_geom_special_details 
; 
 All esds (except the esd in the dihedral angle between two l.s. planes) 
 are estimated using the full covariance matrix.  The cell esds are taken 
 into account individually in the estimation of esds in distances, angles 
 and torsion angles; correlations between esds in cell parameters are only 
 used when they are defined by crystal symmetry.  An approximate (isotropic) 
 treatment of cell esds is used for estimating esds involving l.s. planes. 
; 
 
loop_ 
 _geom_bond_atom_site_label_1 
 _geom_bond_atom_site_label_2 
 _geom_bond_distance 
 _geom_bond_site_symmetry_2 
 _geom_bond_publ_flag 
N1 C1 1.297(5) . ? 
N1 H1A 0.895(12) . ? 
N1 H1B 0.894(12) . ? 
N2 C1 1.318(4) . ? 
N2 C1 1.318(4) 2_765 ? 
N3 C2 1.358(4) . ? 
N3 N4 1.371(4) . ? 
N3 C1 1.381(4) . ? 
N4 C4 1.310(5) . ? 
C2 C3 1.343(5) . ? 
C2 H2 0.9300 . ? 
C3 C4 1.397(5) . ? 
C3 H3 0.9300 . ? 
C4 H4 0.9300 . ? 
Cl1 O1 1.405(7) 2_865 ? 
Cl1 O1 1.405(7) . ? 
Cl1 O2 1.416(9) . ? 
Cl1 O2 1.416(9) 2_865 ? 
Cl1 O4 1.424(7) . ? 
Cl1 O4 1.424(7) 2_865 ? 
Cl1 O3 1.430(10) . ? 
Cl1 O3 1.430(10) 2_865 ? 
O1 O1 1.185(19) 2_865 ? 
O1 O4 1.308(12) 2_865 ? 
O2 O3 0.658(16) 2_865 ? 
O3 O2 0.658(16) 2_865 ? 
O4 O1 1.308(12) 2_865 ? 
 
loop_ 
 _geom_angle_atom_site_label_1 
 _geom_angle_atom_site_label_2 
 _geom_angle_atom_site_label_3 
 _geom_angle 
 _geom_angle_site_symmetry_1 
 _geom_angle_site_symmetry_3 
 _geom_angle_publ_flag 
C1 N1 H1A 123(3) . . ? 
C1 N1 H1B 119(3) . . ? 
H1A N1 H1B 118(4) . . ? 
C1 N2 C1 124.1(4) . 2_765 ? 
C2 N3 N4 111.8(3) . . ? 
C2 N3 C1 127.4(3) . . ? 
N4 N3 C1 120.8(3) . . ? 
C4 N4 N3 103.1(3) . . ? 
N1 C1 N2 127.3(3) . . ? 
N1 C1 N3 117.4(3) . . ? 
N2 C1 N3 115.1(3) . . ? 
C3 C2 N3 107.0(3) . . ? 
C3 C2 H2 126.5 . . ? 
N3 C2 H2 126.5 . . ? 
C2 C3 C4 104.9(3) . . ? 
C2 C3 H3 127.6 . . ? 
C4 C3 H3 127.6 . . ? 
N4 C4 C3 113.2(3) . . ? 
N4 C4 H4 123.4 . . ? 
C3 C4 H4 123.4 . . ? 
O1 Cl1 O1 49.9(9) 2_865 . ? 
O1 Cl1 O2 123.8(7) 2_865 . ? 
O1 Cl1 O2 120.1(7) . . ? 
O1 Cl1 O2 120.1(7) 2_865 2_865 ? 
O1 Cl1 O2 123.8(7) . 2_865 ? 
O2 Cl1 O2 108.6(11) . 2_865 ? 
O1 Cl1 O4 55.1(5) 2_865 . ? 
O1 Cl1 O4 103.7(7) . . ? 
O2 Cl1 O4 110.0(6) . . ? 
O2 Cl1 O4 82.7(7) 2_865 . ? 
O1 Cl1 O4 103.7(7) 2_865 2_865 ? 
O1 Cl1 O4 55.1(5) . 2_865 ? 
O2 Cl1 O4 82.7(7) . 2_865 ? 
O2 Cl1 O4 110.0(6) 2_865 2_865 ? 
O4 Cl1 O4 158.7(8) . 2_865 ? 
O1 Cl1 O3 123.1(7) 2_865 . ? 
O1 Cl1 O3 103.5(6) . . ? 
O2 Cl1 O3 113.0(5) . . ? 
O2 Cl1 O3 26.7(7) 2_865 . ? 
O4 Cl1 O3 105.1(7) . . ? 
O4 Cl1 O3 84.2(6) 2_865 . ? 
O1 Cl1 O3 103.5(6) 2_865 2_865 ? 
O1 Cl1 O3 123.1(7) . 2_865 ? 
O2 Cl1 O3 26.7(7) . 2_865 ? 
O2 Cl1 O3 113.0(5) 2_865 2_865 ? 
O4 Cl1 O3 84.2(6) . 2_865 ? 
O4 Cl1 O3 105.1(7) 2_865 2_865 ? 
O3 Cl1 O3 129.0(11) . 2_865 ? 
O1 O1 O4 126.3(6) 2_865 2_865 ? 
O1 O1 Cl1 65.0(4) 2_865 . ? 
O4 O1 Cl1 63.2(5) 2_865 . ? 
O3 O2 Cl1 77.8(15) 2_865 . ? 
O2 O3 Cl1 75.5(14) 2_865 . ? 
O1 O4 Cl1 61.7(5) 2_865 . ? 
 
loop_ 
 _geom_hbond_atom_site_label_D 
 _geom_hbond_atom_site_label_H 
 _geom_hbond_atom_site_label_A 
 _geom_hbond_distance_DH 
 _geom_hbond_distance_HA 
 _geom_hbond_distance_DA 
 _geom_hbond_angle_DHA 
 _geom_hbond_site_symmetry_A 
N1 H1A O1  0.895(12) 2.16(3) 2.946(10) 146(4) . 
N1 H1A O4  0.895(12) 2.30(3) 3.098(11) 149(4) 2_865 
N1 H1B N4  0.894(12) 2.23(3) 3.013(4) 147(4) 5_766 
 
_diffrn_measured_fraction_theta_max    0.987 
_diffrn_reflns_theta_full              27.00 
_diffrn_measured_fraction_theta_full   0.987 
_refine_diff_density_max    0.631 
_refine_diff_density_min   -0.396 
_refine_diff_density_rms    0.058 


#===============================END

data_complex_1

_audit_creation_method            SHELXL-97 
_chemical_name_systematic 
; 
 ? 
; 
_chemical_name_common             ? 
_chemical_melting_point           ? 
_chemical_formula_moiety          ? 
_chemical_formula_sum 
 'C16 H16 Cu N14' 
_chemical_formula_weight          467.97 
 
loop_ 
 _atom_type_symbol 
 _atom_type_description 
 _atom_type_scat_dispersion_real 
 _atom_type_scat_dispersion_imag 
 _atom_type_scat_source 
 'C'  'C'   0.0033   0.0016 
 'International Tables Vol C Tables 4.2.6.8 and 6.1.1.4' 
 'H'  'H'   0.0000   0.0000 
 'International Tables Vol C Tables 4.2.6.8 and 6.1.1.4' 
 'N'  'N'   0.0061   0.0033 
 'International Tables Vol C Tables 4.2.6.8 and 6.1.1.4' 
 'Cu'  'Cu'   0.3201   1.2651 
 'International Tables Vol C Tables 4.2.6.8 and 6.1.1.4' 
 
_symmetry_cell_setting            Tetragonal 
_symmetry_space_group_name_H-M    P4(2)/n 
 
loop_ 
 _symmetry_equiv_pos_as_xyz 
 'x, y, z' 
 '-x+1/2, -y+1/2, z' 
 '-y, x+1/2, z+1/2' 
 'y+1/2, -x, z+1/2' 
 '-x, -y, -z' 
 'x-1/2, y-1/2, -z' 
 'y, -x-1/2, -z-1/2' 
 '-y-1/2, x, -z-1/2' 
 
_cell_length_a                    22.285(8) 
_cell_length_b                    22.285(8) 
_cell_length_c                    3.8905(15) 
_cell_angle_alpha                 90.00 
_cell_angle_beta                  90.00 
_cell_angle_gamma                 90.00 
_cell_volume                      1932.2(12) 
_cell_formula_units_Z             4 
_cell_measurement_temperature     293(2) 
_cell_measurement_reflns_used     ? 
_cell_measurement_theta_min       ? 
_cell_measurement_theta_max       ? 
 
_exptl_crystal_description        ? 
_exptl_crystal_colour             ? 
_exptl_crystal_size_max           0.26 
_exptl_crystal_size_mid           0.21 
_exptl_crystal_size_min           0.06 
_exptl_crystal_density_meas       ? 
_exptl_crystal_density_diffrn     1.609 
_exptl_crystal_density_method     'not measured' 
_exptl_crystal_F_000              956 
_exptl_absorpt_coefficient_mu     1.169 
_exptl_absorpt_correction_type    ? 
_exptl_absorpt_correction_T_min   0.7508 
_exptl_absorpt_correction_T_max   0.9331 
_exptl_absorpt_process_details    ? 
 
_exptl_special_details 
; 
 ? 
; 
 
_diffrn_ambient_temperature       293(2) 
_diffrn_radiation_wavelength      0.71073 
_diffrn_radiation_type            MoK\a 
_diffrn_radiation_source          'fine-focus sealed tube' 
_diffrn_radiation_monochromator   graphite 
_diffrn_measurement_device_type   ? 
_diffrn_measurement_method        ? 
_diffrn_detector_area_resol_mean  ? 
_diffrn_standards_number          ? 
_diffrn_standards_interval_count  ? 
_diffrn_standards_interval_time   ? 
_diffrn_standards_decay_%         ? 
_diffrn_reflns_number             6964 
_diffrn_reflns_av_R_equivalents   0.0424 
_diffrn_reflns_av_sigmaI/netI     0.0704 
_diffrn_reflns_limit_h_min        -12 
_diffrn_reflns_limit_h_max        28 
_diffrn_reflns_limit_k_min        -27 
_diffrn_reflns_limit_k_max        26 
_diffrn_reflns_limit_l_min        -4 
_diffrn_reflns_limit_l_max        4 
_diffrn_reflns_theta_min          3.66 
_diffrn_reflns_theta_max          26.97 
_reflns_number_total              2064 
_reflns_number_gt                 1333 
_reflns_threshold_expression      >2sigma(I) 
 
_computing_data_collection        ? 
_computing_cell_refinement        ? 
_computing_data_reduction         ? 
_computing_structure_solution     'SHELXS-97 (Sheldrick, 1990)' 
_computing_structure_refinement   'SHELXL-97 (Sheldrick, 1997)' 
_computing_molecular_graphics     ? 
_computing_publication_material   ? 
 
_refine_special_details 
; 
 Refinement of F^2^ against ALL reflections.  The weighted R-factor wR and 
 goodness of fit S are based on F^2^, conventional R-factors R are based 
 on F, with F set to zero for negative F^2^. The threshold expression of 
 F^2^ > 2sigma(F^2^) is used only for calculating R-factors(gt) etc. and is 
 not relevant to the choice of reflections for refinement.  R-factors based 
 on F^2^ are statistically about twice as large as those based on F, and R- 
 factors based on ALL data will be even larger. 
; 
 
_refine_ls_structure_factor_coef  Fsqd  
_refine_ls_matrix_type            full 
_refine_ls_weighting_scheme       calc  
_refine_ls_weighting_details 
 'calc w=1/[\s^2^(Fo^2^)+(0.0235P)^2^+1.4710P] where P=(Fo^2^+2Fc^2^)/3' 
_atom_sites_solution_primary      direct 
_atom_sites_solution_secondary    difmap 
_atom_sites_solution_hydrogens    geom 
_refine_ls_hydrogen_treatment     mixed 
_refine_ls_extinction_method      none 
_refine_ls_extinction_coef        ? 
_refine_ls_number_reflns          2064 
_refine_ls_number_parameters      150 
_refine_ls_number_restraints      2 
_refine_ls_R_factor_all           0.1191 
_refine_ls_R_factor_gt            0.0650 
_refine_ls_wR_factor_ref          0.1132 
_refine_ls_wR_factor_gt           0.0999 
_refine_ls_goodness_of_fit_ref    1.181 
_refine_ls_restrained_S_all       1.183 
_refine_ls_shift/su_max           0.000 
_refine_ls_shift/su_mean          0.000 
 
loop_ 
 _atom_site_label 
 _atom_site_type_symbol 
 _atom_site_fract_x 
 _atom_site_fract_y 
 _atom_site_fract_z 
 _atom_site_U_iso_or_equiv 
 _atom_site_adp_type 
 _atom_site_occupancy 
 _atom_site_symmetry_multiplicity 
 _atom_site_calc_flag 
 _atom_site_refinement_flags 
 _atom_site_disorder_assembly 
 _atom_site_disorder_group 
Cu1 Cu 0.5000 0.5000 0.0000 0.0373(2) Uani 1 2 d S . . 
N1 N 0.54232(15) 0.57064(14) 0.1589(9) 0.0423(9) Uani 1 1 d D . . 
H1N H 0.5796(9) 0.5776(16) 0.148(9) 0.042(12) Uiso 1 1 d D . . 
N2 N 0.46440(13) 0.62688(13) 0.4166(8) 0.0356(8) Uani 1 1 d . . . 
N3 N 0.42895(14) 0.53371(14) 0.2057(9) 0.0408(9) Uani 1 1 d D . . 
H3N H 0.3945(9) 0.5159(12) 0.221(7) 0.012(9) Uiso 1 1 d D . . 
N4 N 0.56036(13) 0.66354(13) 0.4195(8) 0.0358(8) Uani 1 1 d . . . 
N5 N 0.62014(14) 0.65752(16) 0.3579(10) 0.0511(10) Uani 1 1 d . . . 
N6 N 0.36658(12) 0.59994(12) 0.5008(8) 0.0316(7) Uani 1 1 d . . . 
N7 N 0.31997(14) 0.56038(14) 0.4864(8) 0.0395(8) Uani 1 1 d . . . 
C1 C 0.52076(18) 0.61658(16) 0.3202(9) 0.0346(9) Uani 1 1 d . . . 
C2 C 0.42356(17) 0.58453(17) 0.3620(9) 0.0332(9) Uani 1 1 d . . . 
C3 C 0.54694(18) 0.71686(17) 0.5670(10) 0.0459(11) Uani 1 1 d . . . 
H3 H 0.5090 0.7303 0.6306 0.055 Uiso 1 1 calc R . . 
C4 C 0.5995(2) 0.7470(2) 0.6044(12) 0.0564(13) Uani 1 1 d . . . 
H4 H 0.6054 0.7849 0.6984 0.068 Uiso 1 1 calc R . . 
C5 C 0.64282(19) 0.7084(2) 0.4706(13) 0.0593(13) Uani 1 1 d . . . 
H5 H 0.6835 0.7176 0.4618 0.071 Uiso 1 1 calc R . . 
C6 C 0.27570(17) 0.58925(18) 0.6389(10) 0.0426(10) Uani 1 1 d . . . 
H6 H 0.2375 0.5733 0.6691 0.051 Uiso 1 1 calc R . . 
C7 C 0.29253(17) 0.64645(17) 0.7501(11) 0.0440(10) Uani 1 1 d . . . 
H7 H 0.2688 0.6747 0.8615 0.053 Uiso 1 1 calc R . . 
C8 C 0.35067(17) 0.65158(17) 0.6603(9) 0.0383(10) Uani 1 1 d . . . 
H8 H 0.3753 0.6845 0.7004 0.046 Uiso 1 1 calc R . . 
 
loop_ 
 _atom_site_aniso_label 
 _atom_site_aniso_U_11 
 _atom_site_aniso_U_22 
 _atom_site_aniso_U_33 
 _atom_site_aniso_U_23 
 _atom_site_aniso_U_13 
 _atom_site_aniso_U_12 
Cu1 0.0424(4) 0.0281(4) 0.0414(4) -0.0006(4) 0.0026(4) 0.0055(3) 
N1 0.034(2) 0.037(2) 0.055(2) -0.0043(18) 0.0027(19) 0.0030(17) 
N2 0.0309(18) 0.0328(18) 0.043(2) -0.0028(15) -0.0004(16) 0.0014(15) 
N3 0.037(2) 0.0297(19) 0.056(2) -0.0062(17) 0.0087(18) -0.0043(15) 
N4 0.0305(18) 0.0325(18) 0.044(2) -0.0018(16) 0.0024(16) 0.0011(14) 
N5 0.034(2) 0.049(2) 0.070(3) -0.001(2) 0.0037(19) -0.0014(17) 
N6 0.0304(17) 0.0283(17) 0.0361(17) -0.0027(16) -0.0020(16) 0.0010(14) 
N7 0.0367(19) 0.0398(19) 0.0420(19) 0.0031(17) -0.0014(18) -0.0042(16) 
C1 0.044(3) 0.028(2) 0.032(2) 0.0053(19) -0.005(2) 0.0016(19) 
C2 0.037(2) 0.032(2) 0.030(2) 0.0069(18) -0.0027(19) 0.0046(18) 
C3 0.042(3) 0.042(3) 0.054(3) -0.007(2) -0.005(2) 0.002(2) 
C4 0.057(3) 0.042(3) 0.070(3) -0.005(2) -0.013(3) -0.009(2) 
C5 0.038(3) 0.057(3) 0.083(4) 0.005(3) -0.003(3) -0.011(2) 
C6 0.033(2) 0.051(3) 0.044(2) 0.010(2) 0.001(2) -0.006(2) 
C7 0.042(3) 0.043(3) 0.047(3) 0.002(2) 0.010(2) 0.007(2) 
C8 0.042(3) 0.035(2) 0.038(2) -0.0008(19) 0.003(2) -0.0001(19) 
 
_geom_special_details 
; 
 All esds (except the esd in the dihedral angle between two l.s. planes) 
 are estimated using the full covariance matrix.  The cell esds are taken 
 into account individually in the estimation of esds in distances, angles 
 and torsion angles; correlations between esds in cell parameters are only 
 used when they are defined by crystal symmetry.  An approximate (isotropic) 
 treatment of cell esds is used for estimating esds involving l.s. planes. 
; 
 
loop_ 
 _geom_bond_atom_site_label_1 
 _geom_bond_atom_site_label_2 
 _geom_bond_distance 
 _geom_bond_site_symmetry_2 
 _geom_bond_publ_flag 
Cu1 N3 1.927(3) 5_665 ? 
Cu1 N3 1.927(3) . ? 
Cu1 N1 1.936(3) . ? 
Cu1 N1 1.936(3) 5_665 ? 
N1 C1 1.293(5) . ? 
N1 H1N 0.845(18) . ? 
N2 C2 1.328(4) . ? 
N2 C1 1.331(4) . ? 
N3 C2 1.291(4) . ? 
N3 H3N 0.866(16) . ? 
N4 C3 1.353(5) . ? 
N4 N5 1.360(4) . ? 
N4 C1 1.422(4) . ? 
N5 C5 1.316(5) . ? 
N6 C8 1.355(4) . ? 
N6 N7 1.364(4) . ? 
N6 C2 1.422(4) . ? 
N7 C6 1.319(5) . ? 
C3 C4 1.358(5) . ? 
C3 H3 0.9300 . ? 
C4 C5 1.393(6) . ? 
C4 H4 0.9300 . ? 
C5 H5 0.9300 . ? 
C6 C7 1.398(5) . ? 
C6 H6 0.9300 . ? 
C7 C8 1.347(5) . ? 
C7 H7 0.9300 . ? 
C8 H8 0.9300 . ? 
 
loop_ 
 _geom_angle_atom_site_label_1 
 _geom_angle_atom_site_label_2 
 _geom_angle_atom_site_label_3 
 _geom_angle 
 _geom_angle_site_symmetry_1 
 _geom_angle_site_symmetry_3 
 _geom_angle_publ_flag 
N3 Cu1 N3 180.00(11) 5_665 . ? 
N3 Cu1 N1 92.83(14) 5_665 . ? 
N3 Cu1 N1 87.17(14) . . ? 
N3 Cu1 N1 87.17(14) 5_665 5_665 ? 
N3 Cu1 N1 92.83(14) . 5_665 ? 
N1 Cu1 N1 180.0 . 5_665 ? 
C1 N1 Cu1 128.1(3) . . ? 
C1 N1 H1N 104(3) . . ? 
Cu1 N1 H1N 128(3) . . ? 
C2 N2 C1 118.6(3) . . ? 
C2 N3 Cu1 127.9(3) . . ? 
C2 N3 H3N 107(2) . . ? 
Cu1 N3 H3N 125.4(19) . . ? 
C3 N4 N5 112.2(3) . . ? 
C3 N4 C1 128.6(3) . . ? 
N5 N4 C1 119.2(3) . . ? 
C5 N5 N4 103.4(3) . . ? 
C8 N6 N7 111.6(3) . . ? 
C8 N6 C2 127.8(3) . . ? 
N7 N6 C2 120.6(3) . . ? 
C6 N7 N6 103.7(3) . . ? 
N1 C1 N2 128.6(4) . . ? 
N1 C1 N4 118.9(4) . . ? 
N2 C1 N4 112.5(3) . . ? 
N3 C2 N2 129.4(4) . . ? 
N3 C2 N6 118.3(3) . . ? 
N2 C2 N6 112.3(3) . . ? 
N4 C3 C4 106.8(4) . . ? 
N4 C3 H3 126.6 . . ? 
C4 C3 H3 126.6 . . ? 
C3 C4 C5 104.6(4) . . ? 
C3 C4 H4 127.7 . . ? 
C5 C4 H4 127.7 . . ? 
N5 C5 C4 113.0(4) . . ? 
N5 C5 H5 123.5 . . ? 
C4 C5 H5 123.5 . . ? 
N7 C6 C7 112.6(3) . . ? 
N7 C6 H6 123.7 . . ? 
C7 C6 H6 123.7 . . ? 
C8 C7 C6 104.8(4) . . ? 
C8 C7 H7 127.6 . . ? 
C6 C7 H7 127.6 . . ? 
C7 C8 N6 107.4(3) . . ? 
C7 C8 H8 126.3 . . ? 
N6 C8 H8 126.3 . . ? 
 
loop_ 
 _geom_hbond_atom_site_label_D 
 _geom_hbond_atom_site_label_H 
 _geom_hbond_atom_site_label_A 
 _geom_hbond_distance_DH 
 _geom_hbond_distance_HA 
 _geom_hbond_distance_DA 
 _geom_hbond_angle_DHA 
 _geom_hbond_site_symmetry_A 
N1 H1N N5  0.845(18) 2.16(3) 2.712(5) 123(3) . 
N3 H3N N7  0.866(16) 2.19(3) 2.729(5) 120(2) . 
 
_diffrn_measured_fraction_theta_max    0.990 
_diffrn_reflns_theta_full              26.97 
_diffrn_measured_fraction_theta_full   0.990 
_refine_diff_density_max    0.218 
_refine_diff_density_min   -0.267 
_refine_diff_density_rms    0.054 


#===============================END

data_complex_2

_audit_creation_method            SHELXL-97 
_chemical_name_systematic 
; 
 ? 
; 
_chemical_name_common             ? 
_chemical_melting_point           ? 
_chemical_formula_moiety          ? 
_chemical_formula_sum 
 'C27 H31 N22 Ni1.50 O' 
_chemical_formula_weight          767.80 
 
loop_ 
 _atom_type_symbol 
 _atom_type_description 
 _atom_type_scat_dispersion_real 
 _atom_type_scat_dispersion_imag 
 _atom_type_scat_source 
 'C'  'C'   0.0033   0.0016 
 'International Tables Vol C Tables 4.2.6.8 and 6.1.1.4' 
 'H'  'H'   0.0000   0.0000 
 'International Tables Vol C Tables 4.2.6.8 and 6.1.1.4' 
 'N'  'N'   0.0061   0.0033 
 'International Tables Vol C Tables 4.2.6.8 and 6.1.1.4' 
 'O'  'O'   0.0106   0.0060 
 'International Tables Vol C Tables 4.2.6.8 and 6.1.1.4' 
 'Ni'  'Ni'   0.3393   1.1124 
 'International Tables Vol C Tables 4.2.6.8 and 6.1.1.4' 
 
_symmetry_cell_setting            Monoclinic 
_symmetry_space_group_name_H-M    P2(1)/n 
 
loop_ 
 _symmetry_equiv_pos_as_xyz 
 'x, y, z' 
 '-x+1/2, y+1/2, -z+1/2' 
 '-x, -y, -z' 
 'x-1/2, -y-1/2, z-1/2' 
 
_cell_length_a                    11.2713(16) 
_cell_length_b                    16.454(2) 
_cell_length_c                    17.633(3) 
_cell_angle_alpha                 90.00 
_cell_angle_beta                  90.632(3) 
_cell_angle_gamma                 90.00 
_cell_volume                      3270.0(8) 
_cell_formula_units_Z             4 
_cell_measurement_temperature     293(2) 
_cell_measurement_reflns_used     ? 
_cell_measurement_theta_min       ? 
_cell_measurement_theta_max       ? 
 
_exptl_crystal_description        ? 
_exptl_crystal_colour             ? 
_exptl_crystal_size_max           0.26 
_exptl_crystal_size_mid           0.20 
_exptl_crystal_size_min           0.15 
_exptl_crystal_density_meas       ? 
_exptl_crystal_density_diffrn     1.560 
_exptl_crystal_density_method     'not measured' 
_exptl_crystal_F_000              1588 
_exptl_absorpt_coefficient_mu     0.936 
_exptl_absorpt_correction_type    ? 
_exptl_absorpt_correction_T_min   0.7903 
_exptl_absorpt_correction_T_max   0.8739 
_exptl_absorpt_process_details    ? 
 
_exptl_special_details 
; 
 ? 
; 
 
_diffrn_ambient_temperature       293(2) 
_diffrn_radiation_wavelength      0.71073 
_diffrn_radiation_type            MoK\a 
_diffrn_radiation_source          'fine-focus sealed tube' 
_diffrn_radiation_monochromator   graphite 
_diffrn_measurement_device_type   ? 
_diffrn_measurement_method        ? 
_diffrn_detector_area_resol_mean  ? 
_diffrn_standards_number          ? 
_diffrn_standards_interval_count  ? 
_diffrn_standards_interval_time   ? 
_diffrn_standards_decay_%         ? 
_diffrn_reflns_number             13358 
_diffrn_reflns_av_R_equivalents   0.0410 
_diffrn_reflns_av_sigmaI/netI     0.0761 
_diffrn_reflns_limit_h_min        -11 
_diffrn_reflns_limit_h_max        14 
_diffrn_reflns_limit_k_min        -20 
_diffrn_reflns_limit_k_max        9 
_diffrn_reflns_limit_l_min        -22 
_diffrn_reflns_limit_l_max        21 
_diffrn_reflns_theta_min          1.69 
_diffrn_reflns_theta_max          26.99 
_reflns_number_total              6851 
_reflns_number_gt                 4497 
_reflns_threshold_expression      >2sigma(I) 
 
_computing_data_collection        ? 
_computing_cell_refinement        ? 
_computing_data_reduction         ? 
_computing_structure_solution     'SHELXS-97 (Sheldrick, 1990)' 
_computing_structure_refinement   'SHELXL-97 (Sheldrick, 1997)' 
_computing_molecular_graphics     ? 
_computing_publication_material   ? 
 
_refine_special_details 
; 
 Refinement of F^2^ against ALL reflections.  The weighted R-factor wR and 
 goodness of fit S are based on F^2^, conventional R-factors R are based 
 on F, with F set to zero for negative F^2^. The threshold expression of 
 F^2^ > 2sigma(F^2^) is used only for calculating R-factors(gt) etc. and is 
 not relevant to the choice of reflections for refinement.  R-factors based 
 on F^2^ are statistically about twice as large as those based on F, and R- 
 factors based on ALL data will be even larger. 
; 
 
_refine_ls_structure_factor_coef  Fsqd  
_refine_ls_matrix_type            full 
_refine_ls_weighting_scheme       calc  
_refine_ls_weighting_details 
 'calc w=1/[\s^2^(Fo^2^)+(0.0725P)^2^+0.0000P] where P=(Fo^2^+2Fc^2^)/3' 
_atom_sites_solution_primary      direct 
_atom_sites_solution_secondary    difmap 
_atom_sites_solution_hydrogens    geom 
_refine_ls_hydrogen_treatment     mixed 
_refine_ls_extinction_method      none 
_refine_ls_extinction_coef        ? 
_refine_ls_number_reflns          6851 
_refine_ls_number_parameters      492 
_refine_ls_number_restraints      6 
_refine_ls_R_factor_all           0.1046 
_refine_ls_R_factor_gt            0.0638 
_refine_ls_wR_factor_ref          0.1591 
_refine_ls_wR_factor_gt           0.1394 
_refine_ls_goodness_of_fit_ref    1.049 
_refine_ls_restrained_S_all       1.050 
_refine_ls_shift/su_max           0.001 
_refine_ls_shift/su_mean          0.000 
 
loop_ 
 _atom_site_label 
 _atom_site_type_symbol 
 _atom_site_fract_x 
 _atom_site_fract_y 
 _atom_site_fract_z 
 _atom_site_U_iso_or_equiv 
 _atom_site_adp_type 
 _atom_site_occupancy 
 _atom_site_symmetry_multiplicity 
 _atom_site_calc_flag 
 _atom_site_refinement_flags 
 _atom_site_disorder_assembly 
 _atom_site_disorder_group 
Ni1 Ni 0.5000 1.0000 0.0000 0.0363(2) Uani 1 2 d S . . 
Ni2 Ni 0.41423(4) 0.83749(3) 0.14565(3) 0.03200(17) Uani 1 1 d . . . 
N1 N 0.3739(3) 1.0401(2) 0.0556(2) 0.0399(8) Uani 1 1 d D . . 
H1N H 0.307(3) 1.014(2) 0.055(3) 0.053(14) Uiso 1 1 d D . . 
N2 N 0.4657(3) 1.14772(19) 0.12340(19) 0.0398(8) Uani 1 1 d . . . 
N3 N 0.5995(3) 1.0753(2) 0.0461(2) 0.0421(9) Uani 1 1 d D . . 
H3N H 0.673(2) 1.076(2) 0.041(2) 0.044(14) Uiso 1 1 d D . . 
N4 N 0.2691(3) 1.12044(19) 0.14014(19) 0.0378(8) Uani 1 1 d . . . 
N5 N 0.1671(3) 1.0796(2) 0.1222(2) 0.0467(9) Uani 1 1 d . . . 
N6 N 0.6598(3) 1.18554(18) 0.12071(18) 0.0375(8) Uani 1 1 d . . . 
N7 N 0.7745(3) 1.1763(2) 0.0995(2) 0.0495(9) Uani 1 1 d . . . 
N8 N 0.3191(3) 0.75980(19) 0.09804(19) 0.0357(8) Uani 1 1 d D . . 
H8N H 0.248(2) 0.751(2) 0.105(3) 0.053(15) Uiso 1 1 d D . . 
N9 N 0.4595(3) 0.69162(19) 0.02131(18) 0.0354(8) Uani 1 1 d . . . 
N10 N 0.5437(3) 0.7991(2) 0.0929(2) 0.0393(8) Uani 1 1 d D . . 
H10N H 0.611(3) 0.824(2) 0.094(2) 0.053(14) Uiso 1 1 d D . . 
N11 N 0.2679(3) 0.64890(18) 0.02030(18) 0.0328(8) Uani 1 1 d . . . 
N12 N 0.1528(3) 0.6530(2) 0.0403(2) 0.0507(10) Uani 1 1 d . . . 
N13 N 0.6576(3) 0.72026(18) 0.01066(18) 0.0341(8) Uani 1 1 d . . . 
N14 N 0.7571(3) 0.7613(2) 0.0317(2) 0.0446(9) Uani 1 1 d . . . 
N15 N 0.2863(3) 0.8769(2) 0.2015(2) 0.0365(8) Uani 1 1 d D . . 
H15N H 0.221(2) 0.855(2) 0.198(2) 0.025(11) Uiso 1 1 d D . . 
N16 N 0.3792(3) 0.98163(19) 0.27335(19) 0.0364(8) Uani 1 1 d . . . 
N17 N 0.5119(3) 0.91376(19) 0.1921(2) 0.0372(8) Uani 1 1 d D . . 
H17N H 0.585(2) 0.923(2) 0.187(2) 0.030(11) Uiso 1 1 d D . . 
N18 N 0.1821(3) 0.95642(18) 0.28826(18) 0.0375(8) Uani 1 1 d . . . 
N19 N 0.1685(4) 1.0172(2) 0.3416(2) 0.0674(12) Uani 1 1 d . . . 
N20 N 0.5733(3) 1.02297(18) 0.26739(18) 0.0353(8) Uani 1 1 d . . . 
N21 N 0.6883(3) 1.0111(2) 0.2465(2) 0.0428(9) Uani 1 1 d . . . 
C1 C 0.3765(4) 1.1003(2) 0.1033(2) 0.0334(9) Uani 1 1 d . . . 
C2 C 0.5706(4) 1.1319(2) 0.0943(2) 0.0362(10) Uani 1 1 d . . . 
C3 C 0.2515(4) 1.1766(2) 0.1954(2) 0.0469(11) Uani 1 1 d . . . 
H3 H 0.3081 1.2111 0.2167 0.056 Uiso 1 1 calc R . . 
C4 C 0.1362(4) 1.1723(3) 0.2132(3) 0.0580(13) Uani 1 1 d . . . 
H4 H 0.0967 1.2034 0.2489 0.070 Uiso 1 1 calc R . . 
C5 C 0.0877(4) 1.1119(3) 0.1672(3) 0.0538(12) Uani 1 1 d . . . 
H5 H 0.0085 1.0961 0.1682 0.065 Uiso 1 1 calc R . . 
C6 C 0.6456(4) 1.2518(2) 0.1663(3) 0.0465(11) Uani 1 1 d . . . 
H6 H 0.5751 1.2701 0.1871 0.056 Uiso 1 1 calc R . . 
C7 C 0.7549(4) 1.2859(3) 0.1752(3) 0.0518(12) Uani 1 1 d . . . 
H7 H 0.7749 1.3318 0.2032 0.062 Uiso 1 1 calc R . . 
C8 C 0.8296(4) 1.2370(3) 0.1333(3) 0.0509(12) Uani 1 1 d . . . 
H8 H 0.9107 1.2462 0.1294 0.061 Uiso 1 1 calc R . . 
C9 C 0.3518(4) 0.7052(2) 0.0493(2) 0.0317(9) Uani 1 1 d . . . 
C10 C 0.5473(3) 0.7403(2) 0.0444(2) 0.0322(9) Uani 1 1 d . . . 
C11 C 0.2888(4) 0.5844(2) -0.0269(2) 0.0430(11) Uani 1 1 d . . . 
H11 H 0.3614 0.5695 -0.0473 0.052 Uiso 1 1 calc R . . 
C12 C 0.1840(4) 0.5470(2) -0.0379(3) 0.0503(12) Uani 1 1 d . . . 
H12 H 0.1688 0.5013 -0.0675 0.060 Uiso 1 1 calc R . . 
C13 C 0.1027(4) 0.5916(3) 0.0046(3) 0.0523(12) Uani 1 1 d . . . 
H13 H 0.0224 0.5792 0.0073 0.063 Uiso 1 1 calc R . . 
C14 C 0.6809(4) 0.6633(3) -0.0430(3) 0.0510(12) Uani 1 1 d . . . 
H14 H 0.6265 0.6284 -0.0658 0.061 Uiso 1 1 calc R . . 
C15 C 0.7969(4) 0.6674(3) -0.0564(3) 0.0549(12) Uani 1 1 d . . . 
H15 H 0.8395 0.6360 -0.0904 0.066 Uiso 1 1 calc R . . 
C16 C 0.8410(4) 0.7279(3) -0.0094(3) 0.0486(12) Uani 1 1 d . . . 
H16 H 0.9204 0.7432 -0.0071 0.058 Uiso 1 1 calc R . . 
C17 C 0.2892(3) 0.9356(2) 0.2504(2) 0.0330(9) Uani 1 1 d . . . 
C18 C 0.4846(3) 0.9683(2) 0.2418(2) 0.0326(9) Uani 1 1 d . . . 
C19 C 0.0792(3) 0.9187(2) 0.2734(2) 0.0269(8) Uani 1 1 d . . . 
H19 H 0.0662 0.8757 0.2401 0.032 Uiso 1 1 calc R . . 
C20 C 0.0016(4) 0.9548(3) 0.3154(2) 0.0474(11) Uani 1 1 d . . . 
H20 H -0.0783 0.9407 0.3161 0.057 Uiso 1 1 calc R . . 
C21 C 0.0501(4) 1.0165(2) 0.3591(2) 0.0430(11) Uani 1 1 d . . . 
H21 H 0.0110 1.0502 0.3930 0.052 Uiso 1 1 calc R . . 
C22 C 0.5606(4) 1.0913(2) 0.3091(2) 0.0382(10) Uani 1 1 d . . . 
H22 H 0.4903 1.1111 0.3292 0.046 Uiso 1 1 calc R . . 
C23 C 0.6686(4) 1.1253(2) 0.3163(2) 0.0444(11) Uani 1 1 d . . . 
H23 H 0.6887 1.1729 0.3418 0.053 Uiso 1 1 calc R . . 
C24 C 0.7438(4) 1.0730(2) 0.2769(3) 0.0469(11) Uani 1 1 d . . . 
H24 H 0.8251 1.0814 0.2727 0.056 Uiso 1 1 calc R . . 
O1 O 0.0666(3) 0.77513(18) 0.15976(18) 0.0555(9) Uani 1 1 d . . . 
N22 N -0.0327(3) 0.8787(2) 0.1011(2) 0.0458(9) Uani 1 1 d . . . 
C25 C 0.0579(4) 0.8927(3) 0.0448(3) 0.0668(15) Uani 1 1 d . . . 
H25A H 0.1036 0.8440 0.0382 0.100 Uiso 1 1 calc R . . 
H25B H 0.1092 0.9359 0.0615 0.100 Uiso 1 1 calc R . . 
H25C H 0.0210 0.9074 -0.0026 0.100 Uiso 1 1 calc R . . 
C26 C -0.1352(4) 0.9326(3) 0.1006(3) 0.0682(15) Uani 1 1 d . . . 
H26A H -0.1880 0.9173 0.1405 0.102 Uiso 1 1 calc R . . 
H26B H -0.1758 0.9285 0.0526 0.102 Uiso 1 1 calc R . . 
H26C H -0.1093 0.9876 0.1083 0.102 Uiso 1 1 calc R . . 
C27 C -0.0190(4) 0.8205(3) 0.1525(3) 0.0489(12) Uani 1 1 d . . . 
H27 H -0.0806 0.8134 0.1865 0.059 Uiso 1 1 calc R . . 
 
loop_ 
 _atom_site_aniso_label 
 _atom_site_aniso_U_11 
 _atom_site_aniso_U_22 
 _atom_site_aniso_U_33 
 _atom_site_aniso_U_23 
 _atom_site_aniso_U_13 
 _atom_site_aniso_U_12 
Ni1 0.0372(5) 0.0362(4) 0.0355(4) -0.0066(3) 0.0013(3) 0.0043(3) 
Ni2 0.0304(3) 0.0308(3) 0.0348(3) -0.0049(2) 0.0037(2) 0.0001(2) 
N1 0.035(2) 0.043(2) 0.042(2) -0.0086(17) 0.0034(17) -0.0030(17) 
N2 0.040(2) 0.0417(19) 0.038(2) -0.0089(16) 0.0037(17) 0.0014(17) 
N3 0.037(2) 0.045(2) 0.044(2) -0.0124(17) 0.0029(18) 0.0021(18) 
N4 0.035(2) 0.0377(18) 0.041(2) -0.0053(16) 0.0036(16) 0.0031(16) 
N5 0.040(2) 0.052(2) 0.048(2) -0.0088(18) 0.0072(19) -0.0048(18) 
N6 0.037(2) 0.0365(18) 0.039(2) 0.0003(15) 0.0012(16) -0.0006(16) 
N7 0.037(2) 0.055(2) 0.057(2) -0.0048(19) 0.0085(19) -0.0043(19) 
N8 0.031(2) 0.0369(18) 0.039(2) -0.0047(15) 0.0080(17) -0.0032(16) 
N9 0.0311(19) 0.0405(18) 0.0349(19) -0.0102(15) 0.0046(15) -0.0044(15) 
N10 0.031(2) 0.0369(19) 0.050(2) -0.0124(17) 0.0036(17) -0.0065(16) 
N11 0.0271(18) 0.0367(18) 0.0348(19) -0.0017(14) 0.0032(15) -0.0023(14) 
N12 0.036(2) 0.045(2) 0.071(3) -0.0174(19) 0.008(2) -0.0052(17) 
N13 0.0281(19) 0.0381(18) 0.0363(19) -0.0030(15) 0.0048(15) -0.0006(15) 
N14 0.034(2) 0.048(2) 0.052(2) -0.0104(17) 0.0031(18) -0.0083(17) 
N15 0.032(2) 0.0356(18) 0.042(2) -0.0049(16) 0.0032(17) -0.0037(16) 
N16 0.0264(19) 0.0400(18) 0.043(2) -0.0088(16) 0.0059(16) -0.0015(15) 
N17 0.029(2) 0.0365(19) 0.046(2) -0.0102(16) 0.0048(17) -0.0035(16) 
N18 0.040(2) 0.0372(18) 0.0353(19) -0.0096(15) 0.0073(16) 0.0071(16) 
N19 0.079(3) 0.060(3) 0.063(3) -0.006(2) 0.010(3) 0.012(2) 
N20 0.031(2) 0.0336(17) 0.041(2) -0.0076(15) -0.0009(16) -0.0008(15) 
N21 0.026(2) 0.044(2) 0.058(2) -0.0069(17) 0.0054(17) 0.0015(16) 
C1 0.039(3) 0.031(2) 0.031(2) 0.0005(17) -0.0012(19) 0.0044(18) 
C2 0.042(3) 0.033(2) 0.033(2) 0.0022(18) -0.004(2) -0.0007(19) 
C3 0.050(3) 0.048(3) 0.043(3) -0.019(2) 0.002(2) -0.001(2) 
C4 0.053(3) 0.068(3) 0.054(3) -0.021(3) 0.009(3) 0.003(3) 
C5 0.043(3) 0.062(3) 0.057(3) -0.005(2) 0.015(2) -0.003(2) 
C6 0.048(3) 0.041(2) 0.051(3) -0.009(2) -0.001(2) 0.001(2) 
C7 0.056(3) 0.048(3) 0.052(3) -0.008(2) 0.000(2) -0.009(2) 
C8 0.040(3) 0.054(3) 0.059(3) 0.003(2) 0.003(2) -0.011(2) 
C9 0.034(2) 0.0300(19) 0.031(2) 0.0017(17) -0.0030(18) -0.0027(18) 
C10 0.033(2) 0.033(2) 0.031(2) 0.0000(17) 0.0040(18) 0.0021(17) 
C11 0.042(3) 0.049(2) 0.038(2) -0.013(2) 0.008(2) -0.003(2) 
C12 0.058(3) 0.043(2) 0.050(3) -0.016(2) 0.004(2) -0.017(2) 
C13 0.038(3) 0.049(3) 0.070(3) -0.011(2) 0.006(2) -0.012(2) 
C14 0.046(3) 0.053(3) 0.054(3) -0.028(2) 0.005(2) -0.001(2) 
C15 0.046(3) 0.062(3) 0.057(3) -0.016(2) 0.011(2) 0.005(2) 
C16 0.031(3) 0.054(3) 0.060(3) -0.012(2) 0.010(2) -0.003(2) 
C17 0.032(2) 0.035(2) 0.032(2) 0.0018(18) 0.0028(18) 0.0060(18) 
C18 0.031(2) 0.030(2) 0.037(2) -0.0020(17) -0.0001(19) -0.0018(17) 
C19 0.0130(19) 0.0332(19) 0.034(2) -0.0141(16) 0.0030(16) -0.0058(16) 
C20 0.033(3) 0.055(3) 0.054(3) 0.002(2) 0.004(2) -0.006(2) 
C21 0.034(3) 0.043(2) 0.053(3) -0.009(2) 0.016(2) 0.007(2) 
C22 0.042(3) 0.033(2) 0.040(2) -0.0031(18) 0.002(2) 0.0017(19) 
C23 0.047(3) 0.035(2) 0.051(3) -0.004(2) -0.003(2) -0.007(2) 
C24 0.032(3) 0.046(3) 0.063(3) 0.000(2) -0.002(2) -0.007(2) 
O1 0.053(2) 0.0505(18) 0.063(2) -0.0031(16) 0.0057(18) -0.0019(16) 
N22 0.043(2) 0.051(2) 0.043(2) -0.0022(18) 0.0046(18) -0.0055(18) 
C25 0.064(4) 0.081(4) 0.056(3) 0.004(3) 0.020(3) -0.017(3) 
C26 0.053(3) 0.065(3) 0.086(4) -0.013(3) -0.002(3) 0.008(3) 
C27 0.042(3) 0.058(3) 0.047(3) -0.010(2) 0.004(2) -0.017(2) 
 
_geom_special_details 
; 
 All esds (except the esd in the dihedral angle between two l.s. planes) 
 are estimated using the full covariance matrix.  The cell esds are taken 
 into account individually in the estimation of esds in distances, angles 
 and torsion angles; correlations between esds in cell parameters are only 
 used when they are defined by crystal symmetry.  An approximate (isotropic) 
 treatment of cell esds is used for estimating esds involving l.s. planes. 
; 
 
loop_ 
 _geom_bond_atom_site_label_1 
 _geom_bond_atom_site_label_2 
 _geom_bond_distance 
 _geom_bond_site_symmetry_2 
 _geom_bond_publ_flag 
Ni1 N3 1.853(4) . ? 
Ni1 N3 1.853(4) 3_675 ? 
Ni1 N1 1.857(4) . ? 
Ni1 N1 1.857(4) 3_675 ? 
Ni2 N10 1.850(3) . ? 
Ni2 N17 1.854(3) . ? 
Ni2 N8 1.862(3) . ? 
Ni2 N15 1.872(3) . ? 
N1 C1 1.300(5) . ? 
N1 H1N 0.87(3) . ? 
N2 C1 1.318(5) . ? 
N2 C2 1.320(5) . ? 
N3 C2 1.304(5) . ? 
N3 H3N 0.84(2) . ? 
N4 C3 1.359(5) . ? 
N4 N5 1.365(4) . ? 
N4 C1 1.419(5) . ? 
N5 C5 1.315(5) . ? 
N6 N7 1.358(4) . ? 
N6 C6 1.365(5) . ? 
N6 C2 1.413(5) . ? 
N7 C8 1.316(5) . ? 
N8 C9 1.299(5) . ? 
N8 H8N 0.83(3) . ? 
N9 C10 1.333(5) . ? 
N9 C9 1.334(5) . ? 
N10 C10 1.293(5) . ? 
N10 H10N 0.86(3) . ? 
N11 N12 1.349(4) . ? 
N11 C11 1.370(5) . ? 
N11 C9 1.416(5) . ? 
N12 C13 1.316(5) . ? 
N13 N14 1.357(4) . ? 
N13 C14 1.358(5) . ? 
N13 C10 1.423(5) . ? 
N14 C16 1.318(5) . ? 
N15 C17 1.294(5) . ? 
N15 H15N 0.83(2) . ? 
N16 C17 1.326(5) . ? 
N16 C18 1.336(5) . ? 
N17 C18 1.294(5) . ? 
N17 H17N 0.84(2) . ? 
N18 C19 1.339(4) . ? 
N18 N19 1.382(5) . ? 
N18 C17 1.427(5) . ? 
N19 C21 1.374(5) . ? 
N20 C22 1.352(5) . ? 
N20 N21 1.365(4) . ? 
N20 C18 1.415(5) . ? 
N21 C24 1.307(5) . ? 
C3 C4 1.343(6) . ? 
C3 H3 0.9300 . ? 
C4 C5 1.390(6) . ? 
C4 H4 0.9300 . ? 
C5 H5 0.9300 . ? 
C6 C7 1.361(6) . ? 
C6 H6 0.9300 . ? 
C7 C8 1.383(6) . ? 
C7 H7 0.9300 . ? 
C8 H8 0.9300 . ? 
C11 C12 1.345(6) . ? 
C11 H11 0.9300 . ? 
C12 C13 1.398(6) . ? 
C12 H12 0.9300 . ? 
C13 H13 0.9300 . ? 
C14 C15 1.333(6) . ? 
C14 H14 0.9300 . ? 
C15 C16 1.384(6) . ? 
C15 H15 0.9300 . ? 
C16 H16 0.9300 . ? 
C19 C20 1.296(5) . ? 
C19 H19 0.9300 . ? 
C20 C21 1.384(6) . ? 
C20 H20 0.9300 . ? 
C21 H21 0.9300 . ? 
C22 C23 1.344(5) . ? 
C22 H22 0.9300 . ? 
C23 C24 1.399(6) . ? 
C23 H23 0.9300 . ? 
C24 H24 0.9300 . ? 
O1 C27 1.225(5) . ? 
N22 C27 1.327(5) . ? 
N22 C25 1.450(5) . ? 
N22 C26 1.456(5) . ? 
C25 H25A 0.9600 . ? 
C25 H25B 0.9600 . ? 
C25 H25C 0.9600 . ? 
C26 H26A 0.9600 . ? 
C26 H26B 0.9600 . ? 
C26 H26C 0.9600 . ? 
C27 H27 0.9300 . ? 
 
loop_ 
 _geom_angle_atom_site_label_1 
 _geom_angle_atom_site_label_2 
 _geom_angle_atom_site_label_3 
 _geom_angle 
 _geom_angle_site_symmetry_1 
 _geom_angle_site_symmetry_3 
 _geom_angle_publ_flag 
N3 Ni1 N3 180.000(1) . 3_675 ? 
N3 Ni1 N1 89.66(16) . . ? 
N3 Ni1 N1 90.34(16) 3_675 . ? 
N3 Ni1 N1 90.34(16) . 3_675 ? 
N3 Ni1 N1 89.66(16) 3_675 3_675 ? 
N1 Ni1 N1 180.000(1) . 3_675 ? 
N10 Ni2 N17 89.17(15) . . ? 
N10 Ni2 N8 89.57(15) . . ? 
N17 Ni2 N8 178.73(16) . . ? 
N10 Ni2 N15 178.30(16) . . ? 
N17 Ni2 N15 89.43(16) . . ? 
N8 Ni2 N15 91.83(15) . . ? 
C1 N1 Ni1 126.9(3) . . ? 
C1 N1 H1N 113(3) . . ? 
Ni1 N1 H1N 119(3) . . ? 
C1 N2 C2 117.6(3) . . ? 
C2 N3 Ni1 127.5(3) . . ? 
C2 N3 H3N 108(3) . . ? 
Ni1 N3 H3N 124(3) . . ? 
C3 N4 N5 111.8(3) . . ? 
C3 N4 C1 128.2(4) . . ? 
N5 N4 C1 120.0(3) . . ? 
C5 N5 N4 103.8(3) . . ? 
N7 N6 C6 111.7(3) . . ? 
N7 N6 C2 121.0(3) . . ? 
C6 N6 C2 127.2(4) . . ? 
C8 N7 N6 103.6(3) . . ? 
C9 N8 Ni2 127.3(3) . . ? 
C9 N8 H8N 105(3) . . ? 
Ni2 N8 H8N 127(3) . . ? 
C10 N9 C9 117.5(3) . . ? 
C10 N10 Ni2 128.2(3) . . ? 
C10 N10 H10N 110(3) . . ? 
Ni2 N10 H10N 121(3) . . ? 
N12 N11 C11 111.7(3) . . ? 
N12 N11 C9 120.9(3) . . ? 
C11 N11 C9 127.4(3) . . ? 
C13 N12 N11 104.2(3) . . ? 
N14 N13 C14 111.6(3) . . ? 
N14 N13 C10 119.6(3) . . ? 
C14 N13 C10 128.8(3) . . ? 
C16 N14 N13 103.8(3) . . ? 
C17 N15 Ni2 126.5(3) . . ? 
C17 N15 H15N 113(3) . . ? 
Ni2 N15 H15N 120(2) . . ? 
C17 N16 C18 117.4(3) . . ? 
C18 N17 Ni2 128.7(3) . . ? 
C18 N17 H17N 101(3) . . ? 
Ni2 N17 H17N 130(3) . . ? 
C19 N18 N19 111.5(3) . . ? 
C19 N18 C17 122.2(3) . . ? 
N19 N18 C17 126.4(4) . . ? 
C21 N19 N18 105.2(4) . . ? 
C22 N20 N21 111.9(3) . . ? 
C22 N20 C18 128.6(3) . . ? 
N21 N20 C18 119.5(3) . . ? 
C24 N21 N20 103.3(3) . . ? 
N1 C1 N2 129.6(4) . . ? 
N1 C1 N4 117.4(4) . . ? 
N2 C1 N4 113.0(3) . . ? 
N3 C2 N2 128.7(4) . . ? 
N3 C2 N6 118.6(4) . . ? 
N2 C2 N6 112.7(3) . . ? 
C4 C3 N4 106.3(4) . . ? 
C4 C3 H3 126.9 . . ? 
N4 C3 H3 126.9 . . ? 
C3 C4 C5 106.1(4) . . ? 
C3 C4 H4 127.0 . . ? 
C5 C4 H4 127.0 . . ? 
N5 C5 C4 112.0(4) . . ? 
N5 C5 H5 124.0 . . ? 
C4 C5 H5 124.0 . . ? 
C7 C6 N6 106.5(4) . . ? 
C7 C6 H6 126.7 . . ? 
N6 C6 H6 126.7 . . ? 
C6 C7 C8 104.8(4) . . ? 
C6 C7 H7 127.6 . . ? 
C8 C7 H7 127.6 . . ? 
N7 C8 C7 113.3(4) . . ? 
N7 C8 H8 123.3 . . ? 
C7 C8 H8 123.3 . . ? 
N8 C9 N9 128.8(4) . . ? 
N8 C9 N11 119.9(4) . . ? 
N9 C9 N11 111.3(3) . . ? 
N10 C10 N9 128.5(4) . . ? 
N10 C10 N13 118.9(4) . . ? 
N9 C10 N13 112.5(3) . . ? 
C12 C11 N11 106.6(4) . . ? 
C12 C11 H11 126.7 . . ? 
N11 C11 H11 126.7 . . ? 
C11 C12 C13 105.2(4) . . ? 
C11 C12 H12 127.4 . . ? 
C13 C12 H12 127.4 . . ? 
N12 C13 C12 112.3(4) . . ? 
N12 C13 H13 123.8 . . ? 
C12 C13 H13 123.8 . . ? 
C15 C14 N13 106.6(4) . . ? 
C15 C14 H14 126.7 . . ? 
N13 C14 H14 126.7 . . ? 
C14 C15 C16 106.1(4) . . ? 
C14 C15 H15 127.0 . . ? 
C16 C15 H15 127.0 . . ? 
N14 C16 C15 111.9(4) . . ? 
N14 C16 H16 124.0 . . ? 
C15 C16 H16 124.0 . . ? 
N15 C17 N16 130.0(4) . . ? 
N15 C17 N18 118.4(4) . . ? 
N16 C17 N18 111.6(3) . . ? 
N17 C18 N16 127.9(4) . . ? 
N17 C18 N20 119.0(4) . . ? 
N16 C18 N20 113.1(3) . . ? 
C20 C19 N18 105.4(3) . . ? 
C20 C19 H19 127.3 . . ? 
N18 C19 H19 127.3 . . ? 
C19 C20 C21 112.9(4) . . ? 
C19 C20 H20 123.6 . . ? 
C21 C20 H20 123.6 . . ? 
N19 C21 C20 105.1(4) . . ? 
N19 C21 H21 127.5 . . ? 
C20 C21 H21 127.5 . . ? 
C23 C22 N20 107.2(4) . . ? 
C23 C22 H22 126.4 . . ? 
N20 C22 H22 126.4 . . ? 
C22 C23 C24 104.6(4) . . ? 
C22 C23 H23 127.7 . . ? 
C24 C23 H23 127.7 . . ? 
N21 C24 C23 113.1(4) . . ? 
N21 C24 H24 123.5 . . ? 
C23 C24 H24 123.5 . . ? 
C27 N22 C25 120.3(4) . . ? 
C27 N22 C26 122.1(4) . . ? 
C25 N22 C26 117.6(4) . . ? 
N22 C25 H25A 109.5 . . ? 
N22 C25 H25B 109.5 . . ? 
H25A C25 H25B 109.5 . . ? 
N22 C25 H25C 109.5 . . ? 
H25A C25 H25C 109.5 . . ? 
H25B C25 H25C 109.5 . . ? 
N22 C26 H26A 109.5 . . ? 
N22 C26 H26B 109.5 . . ? 
H26A C26 H26B 109.5 . . ? 
N22 C26 H26C 109.5 . . ? 
H26A C26 H26C 109.5 . . ? 
H26B C26 H26C 109.5 . . ? 
O1 C27 N22 126.7(4) . . ? 
O1 C27 H27 116.7 . . ? 
N22 C27 H27 116.7 . . ? 
 
loop_ 
 _geom_hbond_atom_site_label_D 
 _geom_hbond_atom_site_label_H 
 _geom_hbond_atom_site_label_A 
 _geom_hbond_distance_DH 
 _geom_hbond_distance_HA 
 _geom_hbond_distance_DA 
 _geom_hbond_angle_DHA 
 _geom_hbond_site_symmetry_A 
N1 H1N N5  0.87(3) 2.25(4) 2.700(5) 112(3) . 
N3 H3N N7  0.84(2) 2.25(4) 2.738(5) 118(3) . 
N8 H8N N12  0.83(3) 2.24(4) 2.756(5) 121(4) . 
N8 H8N O1  0.83(3) 2.30(3) 3.069(5) 154(4) . 
N10 H10N N14  0.86(3) 2.25(4) 2.719(5) 114(3) . 
N15 H15N O1  0.83(2) 2.27(3) 3.072(5) 163(3) . 
N17 H17N N21  0.84(2) 2.13(3) 2.720(5) 127(3) . 
 
_diffrn_measured_fraction_theta_max    0.959 
_diffrn_reflns_theta_full              26.99 
_diffrn_measured_fraction_theta_full   0.959 
_refine_diff_density_max    0.597 
_refine_diff_density_min   -0.626 
_refine_diff_density_rms    0.087 


#===============================END

data_complex_3

_audit_creation_method            SHELXL-97 
_chemical_name_systematic 
; 
 ? 
; 
_chemical_name_common             ? 
_chemical_melting_point           ? 
_chemical_formula_moiety          ? 
_chemical_formula_sum 
 'C30 H34 Co2 Cu N20 O16' 
_chemical_formula_weight          1112.17 
 
loop_ 
 _atom_type_symbol 
 _atom_type_description 
 _atom_type_scat_dispersion_real 
 _atom_type_scat_dispersion_imag 
 _atom_type_scat_source 
 'C'  'C'   0.0033   0.0016 
 'International Tables Vol C Tables 4.2.6.8 and 6.1.1.4' 
 'H'  'H'   0.0000   0.0000 
 'International Tables Vol C Tables 4.2.6.8 and 6.1.1.4' 
 'N'  'N'   0.0061   0.0033 
 'International Tables Vol C Tables 4.2.6.8 and 6.1.1.4' 
 'O'  'O'   0.0106   0.0060 
 'International Tables Vol C Tables 4.2.6.8 and 6.1.1.4' 
 'Co'  'Co'   0.3494   0.9721 
 'International Tables Vol C Tables 4.2.6.8 and 6.1.1.4' 
 'Cu'  'Cu'   0.3201   1.2651 
 'International Tables Vol C Tables 4.2.6.8 and 6.1.1.4' 
 
_symmetry_cell_setting            Triclinic 
_symmetry_space_group_name_H-M    P-1 
 
loop_ 
 _symmetry_equiv_pos_as_xyz 
 'x, y, z' 
 '-x, -y, -z' 
 
_cell_length_a                    7.4824(6) 
_cell_length_b                    8.4117(7) 
_cell_length_c                    17.0050(14) 
_cell_angle_alpha                 86.338(2) 
_cell_angle_beta                  86.662(2) 
_cell_angle_gamma                 68.646(2) 
_cell_volume                      994.07(14) 
_cell_formula_units_Z             1 
_cell_measurement_temperature     123(2) 
_cell_measurement_reflns_used     ? 
_cell_measurement_theta_min       ? 
_cell_measurement_theta_max       ? 
 
_exptl_crystal_description        ? 
_exptl_crystal_colour             ? 
_exptl_crystal_size_max           0.34 
_exptl_crystal_size_mid           0.28 
_exptl_crystal_size_min           0.11 
_exptl_crystal_density_meas       ? 
_exptl_crystal_density_diffrn     1.858 
_exptl_crystal_density_method     'not measured' 
_exptl_crystal_F_000              565 
_exptl_absorpt_coefficient_mu     1.456 
_exptl_absorpt_correction_type    ? 
_exptl_absorpt_correction_T_min   0.6380 
_exptl_absorpt_correction_T_max   0.8515 
_exptl_absorpt_process_details    ? 
 
_exptl_special_details 
; 
 ? 
; 
 
_diffrn_ambient_temperature       123(2) 
_diffrn_radiation_wavelength      0.71073 
_diffrn_radiation_type            MoK\a 
_diffrn_radiation_source          'fine-focus sealed tube' 
_diffrn_radiation_monochromator   graphite 
_diffrn_measurement_device_type   ? 
_diffrn_measurement_method        ? 
_diffrn_detector_area_resol_mean  ? 
_diffrn_standards_number          ? 
_diffrn_standards_interval_count  ? 
_diffrn_standards_interval_time   ? 
_diffrn_standards_decay_%         ? 
_diffrn_reflns_number             4015 
_diffrn_reflns_av_R_equivalents   0.0127 
_diffrn_reflns_av_sigmaI/netI     0.0335 
_diffrn_reflns_limit_h_min        -7 
_diffrn_reflns_limit_h_max        8 
_diffrn_reflns_limit_k_min        -6 
_diffrn_reflns_limit_k_max        9 
_diffrn_reflns_limit_l_min        -20 
_diffrn_reflns_limit_l_max        20 
_diffrn_reflns_theta_min          2.40 
_diffrn_reflns_theta_max          25.00 
_reflns_number_total              3197 
_reflns_number_gt                 2938 
_reflns_threshold_expression      >2sigma(I) 
 
_computing_data_collection        ? 
_computing_cell_refinement        ? 
_computing_data_reduction         ? 
_computing_structure_solution     'SHELXS-97 (Sheldrick, 1990)' 
_computing_structure_refinement   'SHELXL-97 (Sheldrick, 1997)' 
_computing_molecular_graphics     ? 
_computing_publication_material   ? 
 
_refine_special_details 
; 
 Refinement of F^2^ against ALL reflections.  The weighted R-factor wR and 
 goodness of fit S are based on F^2^, conventional R-factors R are based 
 on F, with F set to zero for negative F^2^. The threshold expression of 
 F^2^ > 2sigma(F^2^) is used only for calculating R-factors(gt) etc. and is 
 not relevant to the choice of reflections for refinement.  R-factors based 
 on F^2^ are statistically about twice as large as those based on F, and R- 
 factors based on ALL data will be even larger. 
; 
 
_refine_ls_structure_factor_coef  Fsqd  
_refine_ls_matrix_type            full 
_refine_ls_weighting_scheme       calc  
_refine_ls_weighting_details 
 'calc w=1/[\s^2^(Fo^2^)+(0.0511P)^2^+1.5934P] where P=(Fo^2^+2Fc^2^)/3' 
_atom_sites_solution_primary      direct 
_atom_sites_solution_secondary    difmap 
_atom_sites_solution_hydrogens    geom 
_refine_ls_hydrogen_treatment     mixed 
_refine_ls_extinction_method      none 
_refine_ls_extinction_coef        ? 
_refine_ls_number_reflns          3197 
_refine_ls_number_parameters      329 
_refine_ls_number_restraints      4 
_refine_ls_R_factor_all           0.0392 
_refine_ls_R_factor_gt            0.0366 
_refine_ls_wR_factor_ref          0.1023 
_refine_ls_wR_factor_gt           0.1000 
_refine_ls_goodness_of_fit_ref    1.105 
_refine_ls_restrained_S_all       1.104 
_refine_ls_shift/su_max           0.000 
_refine_ls_shift/su_mean          0.000 
 
loop_ 
 _atom_site_label 
 _atom_site_type_symbol 
 _atom_site_fract_x 
 _atom_site_fract_y 
 _atom_site_fract_z 
 _atom_site_U_iso_or_equiv 
 _atom_site_adp_type 
 _atom_site_occupancy 
 _atom_site_symmetry_multiplicity 
 _atom_site_calc_flag 
 _atom_site_refinement_flags 
 _atom_site_disorder_assembly 
 _atom_site_disorder_group 
Cu1 Cu 0.0000 0.0000 0.0000 0.01538(16) Uani 1 2 d S . . 
Co1 Co -0.10972(6) 0.44281(5) -0.25360(2) 0.01483(15) Uani 1 1 d . . . 
O1 O -0.0787(3) 0.6899(3) -0.25155(13) 0.0195(5) Uani 1 1 d D . . 
H1O H -0.101(6) 0.739(5) -0.2083(13) 0.037(12) Uiso 1 1 d D . . 
O2 O -0.0906(3) 0.2336(3) -0.32655(12) 0.0182(5) Uani 1 1 d D . . 
H2O H 0.015(3) 0.149(3) -0.330(2) 0.034(12) Uiso 1 1 d D . . 
N1 N -0.2172(4) 0.1966(3) -0.03934(15) 0.0168(6) Uani 1 1 d D . . 
H1N H -0.333(3) 0.225(5) -0.015(2) 0.028(11) Uiso 1 1 d D . . 
N2 N -0.0662(4) 0.2834(3) -0.15056(15) 0.0154(6) Uani 1 1 d . . . 
N3 N 0.1673(4) 0.0628(3) -0.07818(16) 0.0181(6) Uani 1 1 d D . . 
H3N H 0.2950(16) 0.016(4) -0.078(2) 0.029(11) Uiso 1 1 d D . . 
N4 N -0.3750(4) 0.5321(3) -0.18859(15) 0.0182(6) Uani 1 1 d . . . 
N5 N -0.3846(4) 0.4271(3) -0.12455(15) 0.0153(6) Uani 1 1 d . . . 
N6 N 0.1880(4) 0.3401(3) -0.24433(15) 0.0163(6) Uani 1 1 d . . . 
N7 N 0.2497(4) 0.2110(3) -0.18805(14) 0.0137(6) Uani 1 1 d . . . 
N8 N -0.1845(4) 0.5570(3) -0.36436(15) 0.0154(6) Uani 1 1 d . . . 
C1 C -0.2151(5) 0.2916(4) -0.10111(17) 0.0145(7) Uani 1 1 d . . . 
C2 C 0.1126(5) 0.1792(4) -0.13406(17) 0.0139(6) Uani 1 1 d . . . 
C3 C -0.5525(5) 0.6478(4) -0.19384(18) 0.0188(7) Uani 1 1 d . . . 
H3 H -0.5902 0.7390 -0.2327 0.023 Uiso 1 1 calc R . . 
C4 C -0.6761(5) 0.6175(4) -0.13467(19) 0.0201(7) Uani 1 1 d . . . 
H4 H -0.8091 0.6814 -0.1262 0.024 Uiso 1 1 calc R . . 
C5 C -0.5661(5) 0.4775(4) -0.09181(18) 0.0190(7) Uani 1 1 d . . . 
H5 H -0.6081 0.4245 -0.0472 0.023 Uiso 1 1 calc R . . 
C6 C 0.3453(5) 0.3470(4) -0.28053(18) 0.0185(7) Uani 1 1 d . . . 
H6 H 0.3472 0.4257 -0.3229 0.022 Uiso 1 1 calc R . . 
C7 C 0.5096(5) 0.2237(4) -0.24872(18) 0.0189(7) Uani 1 1 d . . . 
H7 H 0.6395 0.2028 -0.2650 0.023 Uiso 1 1 calc R . . 
C8 C 0.4437(5) 0.1393(4) -0.18915(19) 0.0189(7) Uani 1 1 d . . . 
H8 H 0.5193 0.0484 -0.1553 0.023 Uiso 1 1 calc R . . 
C9 C -0.2101(5) 0.7235(4) -0.37779(19) 0.0185(7) Uani 1 1 d . . . 
C10 C -0.2568(5) 0.8034(4) -0.4515(2) 0.0244(8) Uani 1 1 d . . . 
H10 H -0.2721 0.9201 -0.4607 0.029 Uiso 1 1 calc R . . 
C11 C -0.2806(5) 0.7105(5) -0.51141(19) 0.0256(8) Uani 1 1 d . . . 
H11 H -0.3139 0.7638 -0.5622 0.031 Uiso 1 1 calc R . . 
C12 C -0.2562(5) 0.5410(4) -0.49776(19) 0.0233(7) Uani 1 1 d . . . 
H12 H -0.2732 0.4760 -0.5385 0.028 Uiso 1 1 calc R . . 
C13 C -0.2062(5) 0.4673(4) -0.42310(18) 0.0174(7) Uani 1 1 d . . . 
C14 C -0.1938(5) 0.8138(4) -0.30742(19) 0.0222(7) Uani 1 1 d . . . 
H14A H -0.1336 0.8987 -0.3231 0.027 Uiso 1 1 calc R . . 
H14B H -0.3230 0.8748 -0.2837 0.027 Uiso 1 1 calc R . . 
C15 C -0.1721(5) 0.2817(4) -0.40251(18) 0.0185(7) Uani 1 1 d . . . 
H15A H -0.2952 0.2628 -0.4023 0.022 Uiso 1 1 calc R . . 
H15B H -0.0839 0.2097 -0.4428 0.022 Uiso 1 1 calc R . . 
N9 N -0.2537(4) 0.7619(3) -0.06906(15) 0.0188(6) Uani 1 1 d . . . 
O3 O -0.1834(3) 0.8501(3) -0.11598(13) 0.0231(5) Uani 1 1 d . . . 
O4 O -0.4245(4) 0.8296(3) -0.04470(14) 0.0283(6) Uani 1 1 d . . . 
O5 O -0.1543(4) 0.6151(3) -0.04840(16) 0.0318(6) Uani 1 1 d . . . 
N10 N 0.2438(4) -0.1389(3) -0.37718(16) 0.0196(6) Uani 1 1 d . . . 
O6 O 0.2398(4) -0.0328(3) -0.32659(15) 0.0318(6) Uani 1 1 d . . . 
O7 O 0.3640(4) -0.2858(3) -0.37262(14) 0.0278(6) Uani 1 1 d . . . 
O8 O 0.1260(4) -0.0922(3) -0.43014(14) 0.0337(6) Uani 1 1 d . . . 
 
loop_ 
 _atom_site_aniso_label 
 _atom_site_aniso_U_11 
 _atom_site_aniso_U_22 
 _atom_site_aniso_U_33 
 _atom_site_aniso_U_23 
 _atom_site_aniso_U_13 
 _atom_site_aniso_U_12 
Cu1 0.0140(3) 0.0147(3) 0.0152(3) 0.0027(2) 0.0017(2) -0.0035(2) 
Co1 0.0148(3) 0.0142(2) 0.0144(2) 0.00110(16) -0.00153(17) -0.00401(19) 
O1 0.0225(14) 0.0157(11) 0.0188(12) -0.0009(9) -0.0014(10) -0.0052(10) 
O2 0.0201(14) 0.0165(11) 0.0158(11) 0.0003(9) -0.0040(9) -0.0037(10) 
N1 0.0128(16) 0.0181(13) 0.0175(13) 0.0011(11) 0.0029(11) -0.0040(12) 
N2 0.0132(16) 0.0150(13) 0.0156(13) 0.0007(10) 0.0023(10) -0.0029(12) 
N3 0.0137(17) 0.0193(14) 0.0189(13) 0.0034(11) 0.0021(11) -0.0041(12) 
N4 0.0228(17) 0.0185(13) 0.0143(13) 0.0032(10) -0.0028(11) -0.0090(13) 
N5 0.0134(16) 0.0166(13) 0.0140(12) 0.0015(10) 0.0011(10) -0.0039(12) 
N6 0.0179(16) 0.0155(13) 0.0153(13) 0.0016(10) -0.0004(11) -0.0061(12) 
N7 0.0130(17) 0.0123(12) 0.0140(12) 0.0019(10) -0.0001(10) -0.0027(11) 
N8 0.0136(15) 0.0159(13) 0.0160(13) -0.0008(10) 0.0012(10) -0.0047(11) 
C1 0.0124(19) 0.0139(15) 0.0175(15) -0.0028(12) -0.0023(12) -0.0044(13) 
C2 0.0153(19) 0.0146(15) 0.0128(14) -0.0010(12) 0.0011(12) -0.0067(14) 
C3 0.017(2) 0.0194(16) 0.0170(15) 0.0003(12) -0.0038(13) -0.0029(14) 
C4 0.0139(19) 0.0231(17) 0.0209(16) -0.0047(13) -0.0016(13) -0.0031(14) 
C5 0.020(2) 0.0230(16) 0.0144(15) -0.0037(13) 0.0013(13) -0.0073(15) 
C6 0.021(2) 0.0208(16) 0.0168(15) -0.0020(12) 0.0040(13) -0.0122(15) 
C7 0.018(2) 0.0206(16) 0.0194(16) -0.0028(13) 0.0032(13) -0.0091(14) 
C8 0.016(2) 0.0166(15) 0.0221(16) -0.0019(13) 0.0016(13) -0.0036(14) 
C9 0.0152(19) 0.0176(16) 0.0200(16) 0.0011(13) 0.0014(13) -0.0034(14) 
C10 0.025(2) 0.0200(17) 0.0255(18) 0.0024(14) 0.0016(15) -0.0065(15) 
C11 0.029(2) 0.0302(19) 0.0163(16) 0.0057(14) -0.0023(14) -0.0095(16) 
C12 0.023(2) 0.0277(18) 0.0180(16) -0.0014(13) -0.0007(14) -0.0081(16) 
C13 0.0121(18) 0.0204(16) 0.0179(15) -0.0010(12) 0.0038(12) -0.0047(14) 
C14 0.030(2) 0.0135(15) 0.0217(16) 0.0015(13) 0.0011(14) -0.0067(15) 
C15 0.021(2) 0.0195(16) 0.0161(15) -0.0014(12) -0.0019(13) -0.0090(14) 
N9 0.0179(18) 0.0200(14) 0.0182(13) -0.0038(11) -0.0002(11) -0.0062(13) 
O3 0.0248(15) 0.0225(12) 0.0229(12) -0.0011(10) 0.0045(10) -0.0103(11) 
O4 0.0162(16) 0.0323(14) 0.0315(14) 0.0034(11) 0.0043(11) -0.0043(12) 
O5 0.0274(16) 0.0215(13) 0.0406(15) 0.0064(11) -0.0013(12) -0.0030(11) 
N10 0.0205(17) 0.0186(14) 0.0202(14) -0.0009(11) 0.0001(12) -0.0078(12) 
O6 0.0365(17) 0.0231(13) 0.0323(14) -0.0083(11) -0.0140(12) -0.0037(11) 
O7 0.0252(15) 0.0212(12) 0.0303(13) -0.0048(10) -0.0022(11) 0.0004(11) 
O8 0.0385(17) 0.0318(14) 0.0252(13) -0.0040(11) -0.0137(12) -0.0036(12) 
 
_geom_special_details 
; 
 All esds (except the esd in the dihedral angle between two l.s. planes) 
 are estimated using the full covariance matrix.  The cell esds are taken 
 into account individually in the estimation of esds in distances, angles 
 and torsion angles; correlations between esds in cell parameters are only 
 used when they are defined by crystal symmetry.  An approximate (isotropic) 
 treatment of cell esds is used for estimating esds involving l.s. planes. 
; 
 
loop_ 
 _geom_bond_atom_site_label_1 
 _geom_bond_atom_site_label_2 
 _geom_bond_distance 
 _geom_bond_site_symmetry_2 
 _geom_bond_publ_flag 
Cu1 N3 1.952(3) . ? 
Cu1 N3 1.952(3) 2 ? 
Cu1 N1 1.963(3) . ? 
Cu1 N1 1.963(3) 2 ? 
Co1 N8 2.070(3) . ? 
Co1 N6 2.087(3) . ? 
Co1 N2 2.103(3) . ? 
Co1 N4 2.119(3) . ? 
Co1 O2 2.175(2) . ? 
Co1 O1 2.177(2) . ? 
O1 C14 1.430(4) . ? 
O1 H1O 0.845(10) . ? 
O2 C15 1.432(4) . ? 
O2 H2O 0.847(10) . ? 
N1 C1 1.281(4) . ? 
N1 H1N 0.895(10) . ? 
N2 C2 1.340(4) . ? 
N2 C1 1.340(4) . ? 
N3 C2 1.290(4) . ? 
N3 H3N 0.891(10) . ? 
N4 C3 1.335(4) . ? 
N4 N5 1.373(4) . ? 
N5 C5 1.363(4) . ? 
N5 C1 1.419(4) . ? 
N6 C6 1.315(4) . ? 
N6 N7 1.365(3) . ? 
N7 C8 1.353(4) . ? 
N7 C2 1.424(4) . ? 
N8 C13 1.341(4) . ? 
N8 C9 1.348(4) . ? 
C3 C4 1.401(5) . ? 
C3 H3 0.9500 . ? 
C4 C5 1.360(5) . ? 
C4 H4 0.9500 . ? 
C5 H5 0.9500 . ? 
C6 C7 1.399(5) . ? 
C6 H6 0.9500 . ? 
C7 C8 1.371(5) . ? 
C7 H7 0.9500 . ? 
C8 H8 0.9500 . ? 
C9 C10 1.385(5) . ? 
C9 C14 1.492(5) . ? 
C10 C11 1.379(5) . ? 
C10 H10 0.9500 . ? 
C11 C12 1.377(5) . ? 
C11 H11 0.9500 . ? 
C12 C13 1.386(5) . ? 
C12 H12 0.9500 . ? 
C13 C15 1.508(4) . ? 
C14 H14A 0.9900 . ? 
C14 H14B 0.9900 . ? 
C15 H15A 0.9900 . ? 
C15 H15B 0.9900 . ? 
N9 O5 1.228(4) . ? 
N9 O4 1.252(4) . ? 
N9 O3 1.274(4) . ? 
N10 O7 1.237(4) . ? 
N10 O8 1.240(4) . ? 
N10 O6 1.270(4) . ? 
 
loop_ 
 _geom_angle_atom_site_label_1 
 _geom_angle_atom_site_label_2 
 _geom_angle_atom_site_label_3 
 _geom_angle 
 _geom_angle_site_symmetry_1 
 _geom_angle_site_symmetry_3 
 _geom_angle_publ_flag 
N3 Cu1 N3 180.0(2) . 2 ? 
N3 Cu1 N1 88.74(11) . . ? 
N3 Cu1 N1 91.26(11) 2 . ? 
N3 Cu1 N1 91.26(11) . 2 ? 
N3 Cu1 N1 88.74(11) 2 2 ? 
N1 Cu1 N1 180.0(3) . 2 ? 
N8 Co1 N6 111.09(10) . . ? 
N8 Co1 N2 165.16(10) . . ? 
N6 Co1 N2 75.62(10) . . ? 
N8 Co1 N4 102.34(10) . . ? 
N6 Co1 N4 144.28(10) . . ? 
N2 Co1 N4 75.06(10) . . ? 
N8 Co1 O2 75.40(9) . . ? 
N6 Co1 O2 89.21(9) . . ? 
N2 Co1 O2 91.81(9) . . ? 
N4 Co1 O2 111.62(10) . . ? 
N8 Co1 O1 74.76(9) . . ? 
N6 Co1 O1 85.39(9) . . ? 
N2 Co1 O1 119.64(9) . . ? 
N4 Co1 O1 91.73(9) . . ? 
O2 Co1 O1 145.33(8) . . ? 
C14 O1 Co1 113.29(18) . . ? 
C14 O1 H1O 105(3) . . ? 
Co1 O1 H1O 118(3) . . ? 
C15 O2 Co1 115.91(17) . . ? 
C15 O2 H2O 111(3) . . ? 
Co1 O2 H2O 119(3) . . ? 
C1 N1 Cu1 126.3(2) . . ? 
C1 N1 H1N 113(2) . . ? 
Cu1 N1 H1N 120(2) . . ? 
C2 N2 C1 121.0(3) . . ? 
C2 N2 Co1 119.0(2) . . ? 
C1 N2 Co1 120.0(2) . . ? 
C2 N3 Cu1 126.1(2) . . ? 
C2 N3 H3N 111(2) . . ? 
Cu1 N3 H3N 123(2) . . ? 
C3 N4 N5 104.9(3) . . ? 
C3 N4 Co1 140.8(2) . . ? 
N5 N4 Co1 113.52(19) . . ? 
C5 N5 N4 110.8(3) . . ? 
C5 N5 C1 130.1(3) . . ? 
N4 N5 C1 119.1(2) . . ? 
C6 N6 N7 105.1(3) . . ? 
C6 N6 Co1 140.5(2) . . ? 
N7 N6 Co1 113.95(19) . . ? 
C8 N7 N6 111.5(2) . . ? 
C8 N7 C2 129.2(3) . . ? 
N6 N7 C2 119.1(3) . . ? 
C13 N8 C9 119.6(3) . . ? 
C13 N8 Co1 120.9(2) . . ? 
C9 N8 Co1 119.5(2) . . ? 
N1 C1 N2 128.2(3) . . ? 
N1 C1 N5 120.7(3) . . ? 
N2 C1 N5 111.1(2) . . ? 
N3 C2 N2 128.5(3) . . ? 
N3 C2 N7 120.5(3) . . ? 
N2 C2 N7 111.0(2) . . ? 
N4 C3 C4 111.2(3) . . ? 
N4 C3 H3 124.4 . . ? 
C4 C3 H3 124.4 . . ? 
C5 C4 C3 105.7(3) . . ? 
C5 C4 H4 127.2 . . ? 
C3 C4 H4 127.2 . . ? 
C4 C5 N5 107.4(3) . . ? 
C4 C5 H5 126.3 . . ? 
N5 C5 H5 126.3 . . ? 
N6 C6 C7 111.4(3) . . ? 
N6 C6 H6 124.3 . . ? 
C7 C6 H6 124.3 . . ? 
C8 C7 C6 105.5(3) . . ? 
C8 C7 H7 127.3 . . ? 
C6 C7 H7 127.3 . . ? 
N7 C8 C7 106.5(3) . . ? 
N7 C8 H8 126.8 . . ? 
C7 C8 H8 126.8 . . ? 
N8 C9 C10 121.2(3) . . ? 
N8 C9 C14 115.2(3) . . ? 
C10 C9 C14 123.5(3) . . ? 
C11 C10 C9 118.9(3) . . ? 
C11 C10 H10 120.6 . . ? 
C9 C10 H10 120.6 . . ? 
C12 C11 C10 120.2(3) . . ? 
C12 C11 H11 119.9 . . ? 
C10 C11 H11 119.9 . . ? 
C11 C12 C13 118.3(3) . . ? 
C11 C12 H12 120.9 . . ? 
C13 C12 H12 120.9 . . ? 
N8 C13 C12 121.9(3) . . ? 
N8 C13 C15 115.6(3) . . ? 
C12 C13 C15 122.5(3) . . ? 
O1 C14 C9 108.4(3) . . ? 
O1 C14 H14A 110.0 . . ? 
C9 C14 H14A 110.0 . . ? 
O1 C14 H14B 110.0 . . ? 
C9 C14 H14B 110.0 . . ? 
H14A C14 H14B 108.4 . . ? 
O2 C15 C13 110.3(2) . . ? 
O2 C15 H15A 109.6 . . ? 
C13 C15 H15A 109.6 . . ? 
O2 C15 H15B 109.6 . . ? 
C13 C15 H15B 109.6 . . ? 
H15A C15 H15B 108.1 . . ? 
O5 N9 O4 121.7(3) . . ? 
O5 N9 O3 120.1(3) . . ? 
O4 N9 O3 118.2(3) . . ? 
O7 N10 O8 121.5(3) . . ? 
O7 N10 O6 119.6(3) . . ? 
O8 N10 O6 118.9(3) . . ? 
 
loop_ 
 _geom_hbond_atom_site_label_D 
 _geom_hbond_atom_site_label_H 
 _geom_hbond_atom_site_label_A 
 _geom_hbond_distance_DH 
 _geom_hbond_distance_HA 
 _geom_hbond_distance_DA 
 _geom_hbond_angle_DHA 
 _geom_hbond_site_symmetry_A 
O1 H1O O3  0.845(10) 1.836(12) 2.676(3) 173(4) . 
O2 H2O O6  0.847(10) 1.820(12) 2.664(3) 175(4) . 
N1 H1N O4  0.895(10) 2.205(19) 3.037(4) 154(3) 2_465 
N3 H3N O4  0.891(10) 2.193(18) 3.033(4) 157(3) 1_645 
 
_diffrn_measured_fraction_theta_max    0.917 
_diffrn_reflns_theta_full              25.00 
_diffrn_measured_fraction_theta_full   0.917 
_refine_diff_density_max    1.088 
_refine_diff_density_min   -0.471 
_refine_diff_density_rms    0.091 

#===============================END

data_complex_4

_audit_creation_method            SHELXL-97 
_chemical_name_systematic 
; 
 ? 
; 
_chemical_name_common             ? 
_chemical_melting_point           ? 
_chemical_formula_moiety          ? 
_chemical_formula_sum 
 'C30 H34 Cu N20 Ni2 O16' 
_chemical_formula_weight          1111.73 
 
loop_ 
 _atom_type_symbol 
 _atom_type_description 
 _atom_type_scat_dispersion_real 
 _atom_type_scat_dispersion_imag 
 _atom_type_scat_source 
 'C'  'C'   0.0033   0.0016 
 'International Tables Vol C Tables 4.2.6.8 and 6.1.1.4' 
 'H'  'H'   0.0000   0.0000 
 'International Tables Vol C Tables 4.2.6.8 and 6.1.1.4' 
 'N'  'N'   0.0061   0.0033 
 'International Tables Vol C Tables 4.2.6.8 and 6.1.1.4' 
 'O'  'O'   0.0106   0.0060 
 'International Tables Vol C Tables 4.2.6.8 and 6.1.1.4' 
 'Ni'  'Ni'   0.3393   1.1124 
 'International Tables Vol C Tables 4.2.6.8 and 6.1.1.4' 
 'Cu'  'Cu'   0.3201   1.2651 
 'International Tables Vol C Tables 4.2.6.8 and 6.1.1.4' 
 
_symmetry_cell_setting            Triclinic 
_symmetry_space_group_name_H-M    P-1 
 
loop_ 
 _symmetry_equiv_pos_as_xyz 
 'x, y, z' 
 '-x, -y, -z' 
 
_cell_length_a                    7.7313(12) 
_cell_length_b                    8.5788(14) 
_cell_length_c                    16.549(3) 
_cell_angle_alpha                 85.636(2) 
_cell_angle_beta                  84.976(3) 
_cell_angle_gamma                 71.365(3) 
_cell_volume                      1034.7(3) 
_cell_formula_units_Z             1 
_cell_measurement_temperature     293(2) 
_cell_measurement_reflns_used     ? 
_cell_measurement_theta_min       ? 
_cell_measurement_theta_max       ? 
 
_exptl_crystal_description        ? 
_exptl_crystal_colour             ? 
_exptl_crystal_size_max           0.35 
_exptl_crystal_size_mid           0.24 
_exptl_crystal_size_min           0.18 
_exptl_crystal_density_meas       ? 
_exptl_crystal_density_diffrn     1.784 
_exptl_crystal_density_method     'not measured' 
_exptl_crystal_F_000              567 
_exptl_absorpt_coefficient_mu     1.507 
_exptl_absorpt_correction_type    ? 
_exptl_absorpt_correction_T_min   0.6228 
_exptl_absorpt_correction_T_max   0.7710 
_exptl_absorpt_process_details    ? 
 
_exptl_special_details 
; 
 ? 
; 
 
_diffrn_ambient_temperature       293(2) 
_diffrn_radiation_wavelength      0.71073 
_diffrn_radiation_type            MoK\a 
_diffrn_radiation_source          'fine-focus sealed tube' 
_diffrn_radiation_monochromator   graphite 
_diffrn_measurement_device_type   ? 
_diffrn_measurement_method        ? 
_diffrn_detector_area_resol_mean  ? 
_diffrn_standards_number          ? 
_diffrn_standards_interval_count  ? 
_diffrn_standards_interval_time   ? 
_diffrn_standards_decay_%         ? 
_diffrn_reflns_number             5241 
_diffrn_reflns_av_R_equivalents   0.0155 
_diffrn_reflns_av_sigmaI/netI     0.0387 
_diffrn_reflns_limit_h_min        -9 
_diffrn_reflns_limit_h_max        7 
_diffrn_reflns_limit_k_min        -10 
_diffrn_reflns_limit_k_max        10 
_diffrn_reflns_limit_l_min        -13 
_diffrn_reflns_limit_l_max        20 
_diffrn_reflns_theta_min          2.47 
_diffrn_reflns_theta_max          26.00 
_reflns_number_total              3946 
_reflns_number_gt                 3457 
_reflns_threshold_expression      >2sigma(I) 
 
_computing_data_collection        ? 
_computing_cell_refinement        ? 
_computing_data_reduction         ? 
_computing_structure_solution     'SHELXS-97 (Sheldrick, 1990)' 
_computing_structure_refinement   'SHELXL-97 (Sheldrick, 1997)' 
_computing_molecular_graphics     ? 
_computing_publication_material   ? 
 
_refine_special_details 
; 
 Refinement of F^2^ against ALL reflections.  The weighted R-factor wR and 
 goodness of fit S are based on F^2^, conventional R-factors R are based 
 on F, with F set to zero for negative F^2^. The threshold expression of 
 F^2^ > 2sigma(F^2^) is used only for calculating R-factors(gt) etc. and is 
 not relevant to the choice of reflections for refinement.  R-factors based 
 on F^2^ are statistically about twice as large as those based on F, and R- 
 factors based on ALL data will be even larger. 
; 
 
_refine_ls_structure_factor_coef  Fsqd  
_refine_ls_matrix_type            full 
_refine_ls_weighting_scheme       calc  
_refine_ls_weighting_details 
 'calc w=1/[\s^2^(Fo^2^)+(0.0520P)^2^+2.2547P] where P=(Fo^2^+2Fc^2^)/3' 
_atom_sites_solution_primary      direct 
_atom_sites_solution_secondary    difmap 
_atom_sites_solution_hydrogens    geom 
_refine_ls_hydrogen_treatment     mixed 
_refine_ls_extinction_method      none 
_refine_ls_extinction_coef        ? 
_refine_ls_number_reflns          3946 
_refine_ls_number_parameters      329 
_refine_ls_number_restraints      10 
_refine_ls_R_factor_all           0.0628 
_refine_ls_R_factor_gt            0.0542 
_refine_ls_wR_factor_ref          0.1266 
_refine_ls_wR_factor_gt           0.1218 
_refine_ls_goodness_of_fit_ref    1.136 
_refine_ls_restrained_S_all       1.141 
_refine_ls_shift/su_max           0.000 
_refine_ls_shift/su_mean          0.000 
 
loop_ 
 _atom_site_label 
 _atom_site_type_symbol 
 _atom_site_fract_x 
 _atom_site_fract_y 
 _atom_site_fract_z 
 _atom_site_U_iso_or_equiv 
 _atom_site_adp_type 
 _atom_site_occupancy 
 _atom_site_symmetry_multiplicity 
 _atom_site_calc_flag 
 _atom_site_refinement_flags 
 _atom_site_disorder_assembly 
 _atom_site_disorder_group 
Cu1 Cu 0.0000 0.0000 0.0000 0.02014(18) Uani 1 2 d S . . 
Ni1 Ni -0.09214(7) 0.38557(6) 0.24884(3) 0.02231(16) Uani 1 1 d . . . 
O1 O -0.1482(5) 0.2075(4) 0.33537(19) 0.0303(7) Uani 1 1 d D . . 
H1O H -0.046(4) 0.137(5) 0.343(3) 0.045(17) Uiso 1 1 d D . . 
O2 O -0.0450(4) 0.6068(4) 0.20553(18) 0.0272(7) Uani 1 1 d D . . 
H2O H -0.093(8) 0.656(7) 0.162(2) 0.060(19) Uiso 1 1 d D . . 
N1 N -0.2002(5) 0.1793(4) 0.0464(2) 0.0233(7) Uani 1 1 d D . . 
H1N H -0.308(3) 0.203(5) 0.025(3) 0.026(12) Uiso 1 1 d D . . 
N2 N -0.0524(5) 0.2486(4) 0.1510(2) 0.0209(7) Uani 1 1 d . . . 
N3 N 0.1598(5) 0.0340(4) 0.0781(2) 0.0219(7) Uani 1 1 d D . . 
H3N H 0.279(2) -0.025(5) 0.078(3) 0.039(14) Uiso 1 1 d D . . 
N4 N -0.3554(5) 0.3849(4) 0.1373(2) 0.0217(7) Uani 1 1 d . . . 
N5 N -0.3475(5) 0.4643(4) 0.2052(2) 0.0246(8) Uani 1 1 d . . . 
N6 N 0.2440(5) 0.1584(4) 0.1844(2) 0.0210(7) Uani 1 1 d . . . 
N7 N 0.1843(5) 0.2646(4) 0.2464(2) 0.0224(7) Uani 1 1 d . . . 
N8 N -0.1450(5) 0.5088(4) 0.3502(2) 0.0270(8) Uani 1 1 d . . . 
C1 C -0.1954(6) 0.2621(5) 0.1077(2) 0.0212(8) Uani 1 1 d . . . 
C2 C 0.1132(6) 0.1419(5) 0.1328(2) 0.0206(8) Uani 1 1 d . . . 
C3 C -0.5222(6) 0.4486(5) 0.1067(3) 0.0243(9) Uani 1 1 d . . . 
H3 H -0.5600 0.4145 0.0612 0.029 Uiso 1 1 calc R . . 
C4 C -0.6241(6) 0.5715(5) 0.1548(3) 0.0267(9) Uani 1 1 d . . . 
H4 H -0.7440 0.6381 0.1488 0.032 Uiso 1 1 calc R . . 
C5 C -0.5101(6) 0.5763(5) 0.2153(3) 0.0276(9) Uani 1 1 d . . . 
H5 H -0.5445 0.6488 0.2571 0.033 Uiso 1 1 calc R . . 
C6 C 0.4254(6) 0.0779(5) 0.1862(3) 0.0257(9) Uani 1 1 d . . . 
H6 H 0.4956 -0.0011 0.1509 0.031 Uiso 1 1 calc R . . 
C7 C 0.4863(6) 0.1342(5) 0.2496(3) 0.0286(9) Uani 1 1 d . . . 
H7 H 0.6052 0.1027 0.2659 0.034 Uiso 1 1 calc R . . 
C8 C 0.3321(6) 0.2489(5) 0.2845(3) 0.0263(9) Uani 1 1 d . . . 
H8 H 0.3333 0.3074 0.3294 0.032 Uiso 1 1 calc R . . 
C9 C -0.2017(7) 0.4429(6) 0.4187(3) 0.0346(11) Uani 1 1 d . . . 
C10 C -0.2499(9) 0.5294(7) 0.4884(3) 0.0544(16) Uani 1 1 d . . . 
H10 H -0.2914 0.4834 0.5359 0.065 Uiso 1 1 calc R . . 
C11 C -0.2349(9) 0.6873(7) 0.4862(3) 0.0566(16) Uani 1 1 d . . . 
H11 H -0.2642 0.7474 0.5327 0.068 Uiso 1 1 calc R . . 
C12 C -0.1764(8) 0.7541(6) 0.4147(3) 0.0432(13) Uani 1 1 d . . . 
H12 H -0.1668 0.8597 0.4123 0.052 Uiso 1 1 calc R . . 
C13 C -0.1324(6) 0.6617(6) 0.3468(3) 0.0302(10) Uani 1 1 d . . . 
C14 C -0.2140(8) 0.2704(6) 0.4134(3) 0.0449(13) Uani 1 1 d . . . 
H14A H -0.1425 0.1975 0.4546 0.054 Uiso 1 1 calc R . . 
H14B H -0.3402 0.2731 0.4242 0.054 Uiso 1 1 calc R . . 
C15 C -0.0709(10) 0.7228(7) 0.2663(3) 0.0520(15) Uani 1 1 d . . . 
H15A H -0.1615 0.8254 0.2499 0.062 Uiso 1 1 calc R . . 
H15B H 0.0431 0.7450 0.2710 0.062 Uiso 1 1 calc R . . 
N9 N -0.3049(5) 0.7469(4) 0.0474(2) 0.0245(8) Uani 1 1 d . . . 
O3 O -0.4615(4) 0.8206(4) 0.02478(18) 0.0289(7) Uani 1 1 d . . . 
O4 O -0.2415(4) 0.8139(4) 0.09847(19) 0.0324(7) Uani 1 1 d . . . 
O5 O -0.2120(4) 0.6133(4) 0.0207(2) 0.0370(8) Uani 1 1 d . . . 
N10 N 0.2406(6) -0.0995(5) 0.3802(2) 0.0374(10) Uani 1 1 d . . . 
O6 O 0.3646(6) -0.2296(5) 0.3892(2) 0.0578(11) Uani 1 1 d . . . 
O7 O 0.1504(7) -0.0675(5) 0.3202(3) 0.0673(13) Uani 1 1 d . . . 
O8 O 0.2007(7) 0.0046(5) 0.4326(3) 0.0733(14) Uani 1 1 d U . . 
 
loop_ 
 _atom_site_aniso_label 
 _atom_site_aniso_U_11 
 _atom_site_aniso_U_22 
 _atom_site_aniso_U_33 
 _atom_site_aniso_U_23 
 _atom_site_aniso_U_13 
 _atom_site_aniso_U_12 
Cu1 0.0221(4) 0.0191(3) 0.0207(4) -0.0059(3) -0.0016(3) -0.0074(3) 
Ni1 0.0271(3) 0.0213(3) 0.0208(3) -0.0057(2) 0.0001(2) -0.0102(2) 
O1 0.0340(19) 0.0295(17) 0.0286(16) -0.0014(13) 0.0000(14) -0.0121(15) 
O2 0.0317(17) 0.0274(16) 0.0266(16) -0.0031(13) -0.0028(13) -0.0143(14) 
N1 0.0220(19) 0.0210(17) 0.0282(19) -0.0059(14) -0.0034(15) -0.0074(15) 
N2 0.0233(18) 0.0223(17) 0.0202(17) -0.0072(13) 0.0004(14) -0.0105(15) 
N3 0.0203(18) 0.0220(17) 0.0236(18) -0.0047(14) -0.0031(14) -0.0058(15) 
N4 0.0253(19) 0.0211(17) 0.0228(17) -0.0048(13) 0.0002(14) -0.0128(15) 
N5 0.029(2) 0.0226(17) 0.0248(18) -0.0083(14) 0.0042(15) -0.0124(16) 
N6 0.0251(19) 0.0202(17) 0.0201(17) -0.0047(13) 0.0005(14) -0.0103(15) 
N7 0.0302(19) 0.0200(17) 0.0196(17) -0.0031(13) 0.0004(14) -0.0114(15) 
N8 0.030(2) 0.0271(19) 0.0245(19) -0.0075(15) 0.0002(15) -0.0087(16) 
C1 0.028(2) 0.0171(19) 0.022(2) -0.0013(15) 0.0002(17) -0.0115(17) 
C2 0.026(2) 0.0193(19) 0.0191(19) 0.0006(15) 0.0000(16) -0.0110(17) 
C3 0.024(2) 0.026(2) 0.027(2) 0.0000(17) -0.0008(17) -0.0134(18) 
C4 0.018(2) 0.025(2) 0.038(2) -0.0020(18) 0.0029(18) -0.0082(18) 
C5 0.028(2) 0.023(2) 0.032(2) -0.0072(17) 0.0052(19) -0.0097(19) 
C6 0.026(2) 0.022(2) 0.028(2) -0.0026(17) -0.0011(18) -0.0062(18) 
C7 0.032(2) 0.028(2) 0.028(2) -0.0004(17) -0.0054(19) -0.013(2) 
C8 0.037(3) 0.027(2) 0.022(2) -0.0008(16) -0.0043(18) -0.019(2) 
C9 0.038(3) 0.035(3) 0.031(2) -0.0061(19) 0.006(2) -0.011(2) 
C10 0.085(5) 0.046(3) 0.032(3) -0.009(2) 0.017(3) -0.025(3) 
C11 0.089(5) 0.047(3) 0.032(3) -0.017(2) 0.015(3) -0.022(3) 
C12 0.060(4) 0.035(3) 0.036(3) -0.013(2) 0.003(2) -0.016(3) 
C13 0.032(2) 0.031(2) 0.029(2) -0.0070(18) -0.0042(19) -0.009(2) 
C14 0.064(4) 0.038(3) 0.035(3) -0.005(2) 0.011(3) -0.023(3) 
C15 0.094(5) 0.040(3) 0.035(3) -0.010(2) 0.000(3) -0.037(3) 
N9 0.025(2) 0.0206(17) 0.0295(19) 0.0009(14) -0.0007(15) -0.0103(16) 
O3 0.0255(17) 0.0270(16) 0.0343(17) -0.0048(13) -0.0064(13) -0.0067(13) 
O4 0.0351(18) 0.0297(17) 0.0344(17) -0.0050(13) -0.0111(14) -0.0099(14) 
O5 0.0303(18) 0.0279(17) 0.051(2) -0.0126(15) -0.0033(15) -0.0040(14) 
N10 0.048(3) 0.031(2) 0.034(2) 0.0019(17) 0.0055(19) -0.017(2) 
O6 0.064(3) 0.045(2) 0.045(2) -0.0017(17) 0.003(2) 0.007(2) 
O7 0.100(4) 0.056(3) 0.067(3) 0.021(2) -0.044(3) -0.049(3) 
O8 0.117(4) 0.044(2) 0.048(2) -0.0146(19) 0.026(2) -0.015(2) 
 
_geom_special_details 
; 
 All esds (except the esd in the dihedral angle between two l.s. planes) 
 are estimated using the full covariance matrix.  The cell esds are taken 
 into account individually in the estimation of esds in distances, angles 
 and torsion angles; correlations between esds in cell parameters are only 
 used when they are defined by crystal symmetry.  An approximate (isotropic) 
 treatment of cell esds is used for estimating esds involving l.s. planes. 
; 
 
loop_ 
 _geom_bond_atom_site_label_1 
 _geom_bond_atom_site_label_2 
 _geom_bond_distance 
 _geom_bond_site_symmetry_2 
 _geom_bond_publ_flag 
Cu1 N1 1.950(3) . ? 
Cu1 N1 1.950(3) 2 ? 
Cu1 N3 1.962(3) . ? 
Cu1 N3 1.962(3) 2 ? 
Ni1 N8 1.992(3) . ? 
Ni1 N2 2.017(3) . ? 
Ni1 N5 2.049(4) . ? 
Ni1 N7 2.054(4) . ? 
Ni1 O2 2.107(3) . ? 
Ni1 O1 2.134(3) . ? 
O1 C14 1.426(6) . ? 
O1 H1O 0.844(10) . ? 
O2 C15 1.425(6) . ? 
O2 H2O 0.850(10) . ? 
N1 C1 1.291(5) . ? 
N1 H1N 0.891(10) . ? 
N2 C1 1.339(5) . ? 
N2 C2 1.339(5) . ? 
N3 C2 1.290(5) . ? 
N3 H3N 0.896(10) . ? 
N4 C3 1.357(5) . ? 
N4 N5 1.372(5) . ? 
N4 C1 1.421(5) . ? 
N5 C5 1.322(6) . ? 
N6 C6 1.353(5) . ? 
N6 N7 1.373(4) . ? 
N6 C2 1.426(5) . ? 
N7 C8 1.318(6) . ? 
N8 C9 1.331(6) . ? 
N8 C13 1.343(6) . ? 
C3 C4 1.361(6) . ? 
C3 H3 0.9300 . ? 
C4 C5 1.401(6) . ? 
C4 H4 0.9300 . ? 
C5 H5 0.9300 . ? 
C6 C7 1.365(6) . ? 
C6 H6 0.9300 . ? 
C7 C8 1.393(6) . ? 
C7 H7 0.9300 . ? 
C8 H8 0.9300 . ? 
C9 C10 1.379(7) . ? 
C9 C14 1.522(7) . ? 
C10 C11 1.394(8) . ? 
C10 H10 0.9300 . ? 
C11 C12 1.379(7) . ? 
C11 H11 0.9300 . ? 
C12 C13 1.378(6) . ? 
C12 H12 0.9300 . ? 
C13 C15 1.490(7) . ? 
C14 H14A 0.9700 . ? 
C14 H14B 0.9700 . ? 
C15 H15A 0.9700 . ? 
C15 H15B 0.9700 . ? 
N9 O5 1.233(5) . ? 
N9 O3 1.249(5) . ? 
N9 O4 1.269(4) . ? 
N10 O6 1.226(5) . ? 
N10 O7 1.226(6) . ? 
N10 O8 1.241(5) . ? 
 
loop_ 
 _geom_angle_atom_site_label_1 
 _geom_angle_atom_site_label_2 
 _geom_angle_atom_site_label_3 
 _geom_angle 
 _geom_angle_site_symmetry_1 
 _geom_angle_site_symmetry_3 
 _geom_angle_publ_flag 
N1 Cu1 N1 180.0(4) . 2 ? 
N1 Cu1 N3 88.97(14) . . ? 
N1 Cu1 N3 91.03(14) 2 . ? 
N1 Cu1 N3 91.03(14) . 2 ? 
N1 Cu1 N3 88.97(14) 2 2 ? 
N3 Cu1 N3 180.0(2) . 2 ? 
N8 Ni1 N2 174.86(14) . . ? 
N8 Ni1 N5 99.63(14) . . ? 
N2 Ni1 N5 78.55(13) . . ? 
N8 Ni1 N7 104.16(14) . . ? 
N2 Ni1 N7 77.95(13) . . ? 
N5 Ni1 N7 156.07(13) . . ? 
N8 Ni1 O2 79.08(13) . . ? 
N2 Ni1 O2 105.67(12) . . ? 
N5 Ni1 O2 91.06(13) . . ? 
N7 Ni1 O2 90.92(13) . . ? 
N8 Ni1 O1 78.85(13) . . ? 
N2 Ni1 O1 96.48(13) . . ? 
N5 Ni1 O1 95.28(13) . . ? 
N7 Ni1 O1 91.82(13) . . ? 
O2 Ni1 O1 157.76(12) . . ? 
C14 O1 Ni1 113.5(3) . . ? 
C14 O1 H1O 105(4) . . ? 
Ni1 O1 H1O 105(4) . . ? 
C15 O2 Ni1 114.1(3) . . ? 
C15 O2 H2O 110(4) . . ? 
Ni1 O2 H2O 119(4) . . ? 
C1 N1 Cu1 126.8(3) . . ? 
C1 N1 H1N 116(3) . . ? 
Cu1 N1 H1N 117(3) . . ? 
C1 N2 C2 121.6(3) . . ? 
C1 N2 Ni1 118.7(3) . . ? 
C2 N2 Ni1 119.6(3) . . ? 
C2 N3 Cu1 126.2(3) . . ? 
C2 N3 H3N 112(3) . . ? 
Cu1 N3 H3N 122(3) . . ? 
C3 N4 N5 110.6(3) . . ? 
C3 N4 C1 130.5(3) . . ? 
N5 N4 C1 118.8(3) . . ? 
C5 N5 N4 105.3(3) . . ? 
C5 N5 Ni1 142.1(3) . . ? 
N4 N5 Ni1 112.3(3) . . ? 
C6 N6 N7 110.9(3) . . ? 
C6 N6 C2 130.4(3) . . ? 
N7 N6 C2 118.6(3) . . ? 
C8 N7 N6 104.7(3) . . ? 
C8 N7 Ni1 142.5(3) . . ? 
N6 N7 Ni1 112.7(3) . . ? 
C9 N8 C13 121.0(4) . . ? 
C9 N8 Ni1 119.9(3) . . ? 
C13 N8 Ni1 119.0(3) . . ? 
N1 C1 N2 128.0(4) . . ? 
N1 C1 N4 120.5(4) . . ? 
N2 C1 N4 111.5(3) . . ? 
N3 C2 N2 128.3(4) . . ? 
N3 C2 N6 121.0(4) . . ? 
N2 C2 N6 110.7(3) . . ? 
N4 C3 C4 107.4(4) . . ? 
N4 C3 H3 126.3 . . ? 
C4 C3 H3 126.3 . . ? 
C3 C4 C5 105.4(4) . . ? 
C3 C4 H4 127.3 . . ? 
C5 C4 H4 127.3 . . ? 
N5 C5 C4 111.2(4) . . ? 
N5 C5 H5 124.4 . . ? 
C4 C5 H5 124.4 . . ? 
N6 C6 C7 107.2(4) . . ? 
N6 C6 H6 126.4 . . ? 
C7 C6 H6 126.4 . . ? 
C6 C7 C8 105.2(4) . . ? 
C6 C7 H7 127.4 . . ? 
C8 C7 H7 127.4 . . ? 
N7 C8 C7 111.9(4) . . ? 
N7 C8 H8 124.0 . . ? 
C7 C8 H8 124.0 . . ? 
N8 C9 C10 121.2(4) . . ? 
N8 C9 C14 115.6(4) . . ? 
C10 C9 C14 123.2(4) . . ? 
C9 C10 C11 118.5(5) . . ? 
C9 C10 H10 120.8 . . ? 
C11 C10 H10 120.8 . . ? 
C12 C11 C10 119.7(5) . . ? 
C12 C11 H11 120.2 . . ? 
C10 C11 H11 120.2 . . ? 
C13 C12 C11 118.9(5) . . ? 
C13 C12 H12 120.5 . . ? 
C11 C12 H12 120.5 . . ? 
N8 C13 C12 120.8(4) . . ? 
N8 C13 C15 115.9(4) . . ? 
C12 C13 C15 123.4(4) . . ? 
O1 C14 C9 111.5(4) . . ? 
O1 C14 H14A 109.3 . . ? 
C9 C14 H14A 109.3 . . ? 
O1 C14 H14B 109.3 . . ? 
C9 C14 H14B 109.3 . . ? 
H14A C14 H14B 108.0 . . ? 
O2 C15 C13 111.9(4) . . ? 
O2 C15 H15A 109.2 . . ? 
C13 C15 H15A 109.2 . . ? 
O2 C15 H15B 109.2 . . ? 
C13 C15 H15B 109.2 . . ? 
H15A C15 H15B 107.9 . . ? 
O5 N9 O3 121.5(4) . . ? 
O5 N9 O4 120.2(4) . . ? 
O3 N9 O4 118.3(3) . . ? 
O6 N10 O7 122.0(5) . . ? 
O6 N10 O8 120.6(5) . . ? 
O7 N10 O8 117.4(5) . . ? 
 
loop_ 
 _geom_hbond_atom_site_label_D 
 _geom_hbond_atom_site_label_H 
 _geom_hbond_atom_site_label_A 
 _geom_hbond_distance_DH 
 _geom_hbond_distance_HA 
 _geom_hbond_distance_DA 
 _geom_hbond_angle_DHA 
 _geom_hbond_site_symmetry_A 
O1 H1O O7  0.844(10) 1.95(3) 2.732(6) 154(5) . 
O1 H1O O8  0.844(10) 2.45(3) 3.198(6) 149(5) . 
O2 H2O O4  0.850(10) 1.81(2) 2.621(4) 159(6) . 
N1 H1N O3  0.891(10) 2.100(18) 2.961(5) 162(4) 2_465 
N3 H3N O3  0.896(10) 2.18(2) 3.011(5) 155(4) 1_645 
 
_diffrn_measured_fraction_theta_max    0.965 
_diffrn_reflns_theta_full              26.00 
_diffrn_measured_fraction_theta_full   0.965 
_refine_diff_density_max    0.921 
_refine_diff_density_min   -0.765 
_refine_diff_density_rms    0.105 

#===============================END

data_complex_5

_audit_creation_method            SHELXL-97 
_chemical_name_systematic 
; 
 ? 
; 
_chemical_name_common             ? 
_chemical_melting_point           ? 
_chemical_formula_moiety          ? 
_chemical_formula_sum 
 'C18 H32 N18 Ni3 O18' 
_chemical_formula_weight          964.75 
 
loop_ 
 _atom_type_symbol 
 _atom_type_description 
 _atom_type_scat_dispersion_real 
 _atom_type_scat_dispersion_imag 
 _atom_type_scat_source 
 'C'  'C'   0.0033   0.0016 
 'International Tables Vol C Tables 4.2.6.8 and 6.1.1.4' 
 'H'  'H'   0.0000   0.0000 
 'International Tables Vol C Tables 4.2.6.8 and 6.1.1.4' 
 'N'  'N'   0.0061   0.0033 
 'International Tables Vol C Tables 4.2.6.8 and 6.1.1.4' 
 'O'  'O'   0.0106   0.0060 
 'International Tables Vol C Tables 4.2.6.8 and 6.1.1.4' 
 'Ni'  'Ni'   0.3393   1.1124 
 'International Tables Vol C Tables 4.2.6.8 and 6.1.1.4' 
 
_symmetry_cell_setting            triclinic 
_symmetry_space_group_name_H-M    P-1 
 
loop_ 
 _symmetry_equiv_pos_as_xyz 
 'x, y, z' 
 '-x, -y, -z' 
 
_cell_length_a                    7.959(1) 
_cell_length_b                    9.275(4) 
_cell_length_c                    13.231(4) 
_cell_angle_alpha                 79.18(3) 
_cell_angle_beta                  72.88(2) 
_cell_angle_gamma                 70.78(2) 
_cell_volume                      876.9(5) 
_cell_formula_units_Z             1 
_cell_measurement_temperature     293(2) 
_cell_measurement_reflns_used     ? 
_cell_measurement_theta_min       ? 
_cell_measurement_theta_max       ? 
 
_exptl_crystal_description        ? 
_exptl_crystal_colour             ? 
_exptl_crystal_size_max           0.25 
_exptl_crystal_size_mid           0.21 
_exptl_crystal_size_min           0.13 
_exptl_crystal_density_meas       ? 
_exptl_crystal_density_diffrn     1.827 
_exptl_crystal_density_method     'not measured' 
_exptl_crystal_F_000              494 
_exptl_absorpt_coefficient_mu     1.696 
_exptl_absorpt_correction_type    ? 
_exptl_absorpt_correction_T_min   0.6764 
_exptl_absorpt_correction_T_max   0.8096 
_exptl_absorpt_process_details    ? 
 
_exptl_special_details 
; 
 ? 
; 
 
_diffrn_ambient_temperature       293(2) 
_diffrn_radiation_wavelength      0.71073 
_diffrn_radiation_type            MoK\a 
_diffrn_radiation_source          'fine-focus sealed tube' 
_diffrn_radiation_monochromator   graphite 
_diffrn_measurement_device_type   ? 
_diffrn_measurement_method        ? 
_diffrn_detector_area_resol_mean  ? 
_diffrn_standards_number          ? 
_diffrn_standards_interval_count  ? 
_diffrn_standards_interval_time   ? 
_diffrn_standards_decay_%         ? 
_diffrn_reflns_number             6170 
_diffrn_reflns_av_R_equivalents   0.0348 
_diffrn_reflns_av_sigmaI/netI     0.0679 
_diffrn_reflns_limit_h_min        -9 
_diffrn_reflns_limit_h_max        9 
_diffrn_reflns_limit_k_min        -11 
_diffrn_reflns_limit_k_max        11 
_diffrn_reflns_limit_l_min        -16 
_diffrn_reflns_limit_l_max        16 
_diffrn_reflns_theta_min          2.71 
_diffrn_reflns_theta_max          26.00 
_reflns_number_total              3247 
_reflns_number_gt                 2193 
_reflns_threshold_expression      >2sigma(I) 
 
_computing_data_collection        ? 
_computing_cell_refinement        ? 
_computing_data_reduction         ? 
_computing_structure_solution     'SHELXS-97 (Sheldrick, 1990)' 
_computing_structure_refinement   'SHELXL-97 (Sheldrick, 1997)' 
_computing_molecular_graphics     ? 
_computing_publication_material   ? 
 
_refine_special_details 
; 
 Refinement of F^2^ against ALL reflections.  The weighted R-factor wR and 
 goodness of fit S are based on F^2^, conventional R-factors R are based 
 on F, with F set to zero for negative F^2^. The threshold expression of 
 F^2^ > 2sigma(F^2^) is used only for calculating R-factors(gt) etc. and is 
 not relevant to the choice of reflections for refinement.  R-factors based 
 on F^2^ are statistically about twice as large as those based on F, and R- 
 factors based on ALL data will be even larger. 
; 
 
_refine_ls_structure_factor_coef  Fsqd  
_refine_ls_matrix_type            full 
_refine_ls_weighting_scheme       calc  
_refine_ls_weighting_details 
 'calc w=1/[\s^2^(Fo^2^)+(0.0481P)^2^+0.0000P] where P=(Fo^2^+2Fc^2^)/3' 
_atom_sites_solution_primary      direct 
_atom_sites_solution_secondary    difmap 
_atom_sites_solution_hydrogens    geom 
_refine_ls_hydrogen_treatment     mixed 
_refine_ls_extinction_method      none 
_refine_ls_extinction_coef        ? 
_refine_ls_number_reflns          3247 
_refine_ls_number_parameters      288 
_refine_ls_number_restraints      15 
_refine_ls_R_factor_all           0.0671 
_refine_ls_R_factor_gt            0.0366 
_refine_ls_wR_factor_ref          0.0951 
_refine_ls_wR_factor_gt           0.0806 
_refine_ls_goodness_of_fit_ref    1.025 
_refine_ls_restrained_S_all       1.038 
_refine_ls_shift/su_max           0.000 
_refine_ls_shift/su_mean          0.000 
 
loop_ 
 _atom_site_label 
 _atom_site_type_symbol 
 _atom_site_fract_x 
 _atom_site_fract_y 
 _atom_site_fract_z 
 _atom_site_U_iso_or_equiv 
 _atom_site_adp_type 
 _atom_site_occupancy 
 _atom_site_symmetry_multiplicity 
 _atom_site_calc_flag 
 _atom_site_refinement_flags 
 _atom_site_disorder_assembly 
 _atom_site_disorder_group 
Ni1 Ni 0.0000 0.5000 0.5000 0.02007(18) Uani 1 2 d S . . 
Ni2 Ni 0.12508(6) 0.14690(5) 0.20140(4) 0.02024(15) Uani 1 1 d . . . 
O1W O 0.0239(4) -0.0197(3) 0.3092(2) 0.0254(6) Uani 1 1 d D . . 
H1WA H 0.113(3) -0.094(3) 0.324(2) 0.020(10) Uiso 1 1 d D . . 
H1WB H -0.043(4) 0.022(4) 0.3650(19) 0.056(16) Uiso 1 1 d D . . 
O2W O 0.1825(4) 0.0174(4) 0.0806(2) 0.0296(6) Uani 1 1 d D . . 
H2WA H 0.157(8) 0.078(5) 0.027(3) 0.10(2) Uiso 1 1 d D . . 
H2WB H 0.131(6) -0.053(4) 0.093(4) 0.062(17) Uiso 1 1 d D . . 
O1 O 0.2200(4) 0.3053(4) 0.0864(3) 0.0458(8) Uani 1 1 d D . . 
H1O H 0.154(5) 0.397(2) 0.091(3) 0.037(13) Uiso 1 1 d D . . 
O2 O -0.2235(4) 0.1119(3) 0.5016(2) 0.0314(7) Uani 1 1 d . . . 
O3 O -0.2898(4) 0.2598(3) 0.6247(2) 0.0335(7) Uani 1 1 d . . . 
O4 O -0.4704(3) 0.3066(3) 0.5206(2) 0.0285(6) Uani 1 1 d . . . 
O5 O 0.1953(5) -0.3552(5) 0.1186(4) 0.0822(14) Uani 1 1 d . . . 
O6 O -0.0336(4) -0.1686(3) 0.0898(2) 0.0378(7) Uani 1 1 d . . . 
O7 O -0.0349(6) -0.4040(4) 0.1081(4) 0.0819(14) Uani 1 1 d U . . 
N1 N -0.1396(4) 0.4810(4) 0.4131(2) 0.0228(7) Uani 1 1 d D . . 
H1N H -0.255(2) 0.540(4) 0.418(3) 0.023(10) Uiso 1 1 d D . . 
N2 N 0.0749(4) 0.2798(4) 0.3174(2) 0.0206(7) Uani 1 1 d . . . 
N3 N 0.1994(4) 0.3393(4) 0.4396(2) 0.0226(7) Uani 1 1 d D . . 
H3N H 0.304(3) 0.313(5) 0.460(3) 0.029(11) Uiso 1 1 d D . . 
N4 N -0.2061(4) 0.3818(4) 0.2830(2) 0.0218(7) Uani 1 1 d . . . 
N5 N -0.1401(4) 0.2807(4) 0.2059(2) 0.0224(7) Uani 1 1 d . . . 
N6 N 0.3666(4) 0.1418(4) 0.3265(2) 0.0213(7) Uani 1 1 d . . . 
N7 N 0.3700(4) 0.0676(3) 0.2451(2) 0.0221(7) Uani 1 1 d . . . 
N8 N -0.3276(4) 0.2255(4) 0.5492(2) 0.0245(7) Uani 1 1 d . . . 
N9 N 0.0400(5) -0.3103(4) 0.1087(3) 0.0338(8) Uani 1 1 d . . . 
C1 C 0.3901(6) 0.2864(6) 0.0098(4) 0.0483(13) Uani 1 1 d . . . 
H1A H 0.3689 0.3168 -0.0599 0.073 Uiso 1 1 calc R . . 
H1B H 0.4618 0.1806 0.0145 0.073 Uiso 1 1 calc R . . 
H1C H 0.4552 0.3489 0.0229 0.073 Uiso 1 1 calc R . . 
C2 C -0.2774(5) 0.3068(4) 0.1607(3) 0.0251(9) Uani 1 1 d . . . 
H2 H -0.2724 0.2548 0.1057 0.030 Uiso 1 1 calc R . . 
C3 C -0.4312(5) 0.4232(5) 0.2069(3) 0.0291(9) Uani 1 1 d . . . 
H3 H -0.5437 0.4612 0.1893 0.035 Uiso 1 1 calc R . . 
C4 C -0.3815(5) 0.4686(4) 0.2823(3) 0.0252(9) Uani 1 1 d . . . 
H4 H -0.4541 0.5455 0.3261 0.030 Uiso 1 1 calc R . . 
C5 C -0.0865(5) 0.3853(4) 0.3423(3) 0.0175(8) Uani 1 1 d . . . 
C6 C 0.2088(5) 0.2616(4) 0.3652(3) 0.0197(8) Uani 1 1 d . . . 
C7 C 0.5261(5) 0.0799(5) 0.3584(3) 0.0260(9) Uani 1 1 d . . . 
H7 H 0.5565 0.1111 0.4118 0.031 Uiso 1 1 calc R . . 
C8 C 0.6321(5) -0.0359(4) 0.2974(3) 0.0264(9) Uani 1 1 d . . . 
H8 H 0.7485 -0.0999 0.3008 0.032 Uiso 1 1 calc R . . 
C9 C 0.5301(5) -0.0391(5) 0.2283(3) 0.0275(9) Uani 1 1 d . . . 
H9 H 0.5701 -0.1077 0.1772 0.033 Uiso 1 1 calc R . . 
 
loop_ 
 _atom_site_aniso_label 
 _atom_site_aniso_U_11 
 _atom_site_aniso_U_22 
 _atom_site_aniso_U_33 
 _atom_site_aniso_U_23 
 _atom_site_aniso_U_13 
 _atom_site_aniso_U_12 
Ni1 0.0148(3) 0.0223(4) 0.0236(4) -0.0100(3) -0.0063(3) -0.0004(3) 
Ni2 0.0185(3) 0.0210(3) 0.0220(3) -0.0074(2) -0.00598(19) -0.0032(2) 
O1W 0.0233(15) 0.0237(15) 0.0290(16) -0.0038(13) -0.0105(13) -0.0023(13) 
O2W 0.0287(16) 0.0302(16) 0.0314(17) -0.0111(14) -0.0100(13) -0.0037(14) 
O1 0.0349(19) 0.0274(18) 0.052(2) -0.0022(16) 0.0151(15) -0.0028(16) 
O2 0.0274(16) 0.0304(16) 0.0314(16) -0.0138(13) -0.0075(12) 0.0039(14) 
O3 0.0348(17) 0.0292(16) 0.0377(17) -0.0094(13) -0.0188(14) 0.0010(14) 
O4 0.0221(15) 0.0308(15) 0.0336(16) -0.0028(13) -0.0180(12) 0.0004(13) 
O5 0.047(2) 0.080(3) 0.121(4) -0.007(3) -0.046(2) 0.001(2) 
O6 0.0491(19) 0.0243(15) 0.0423(18) -0.0058(13) -0.0200(15) -0.0048(15) 
O7 0.087(3) 0.048(2) 0.145(4) 0.025(2) -0.074(3) -0.043(2) 
N1 0.0136(16) 0.0237(17) 0.0301(18) -0.0103(14) -0.0072(14) 0.0017(15) 
N2 0.0143(16) 0.0235(16) 0.0247(17) -0.0113(14) -0.0100(12) 0.0030(14) 
N3 0.0137(16) 0.0261(17) 0.0281(18) -0.0105(15) -0.0093(13) 0.0022(14) 
N4 0.0146(16) 0.0233(17) 0.0270(17) -0.0095(14) -0.0067(13) 0.0004(14) 
N5 0.0213(16) 0.0244(16) 0.0238(17) -0.0109(14) -0.0054(13) -0.0050(14) 
N6 0.0158(16) 0.0225(16) 0.0246(17) -0.0122(14) -0.0022(13) -0.0016(14) 
N7 0.0213(17) 0.0205(16) 0.0235(17) -0.0108(13) -0.0016(13) -0.0039(14) 
N8 0.0232(18) 0.0251(18) 0.0252(18) -0.0049(15) -0.0062(14) -0.0058(16) 
N9 0.035(2) 0.035(2) 0.037(2) -0.0020(17) -0.0149(17) -0.0133(19) 
C1 0.055(3) 0.053(3) 0.037(3) 0.003(2) -0.007(2) -0.023(3) 
C2 0.025(2) 0.028(2) 0.028(2) -0.0060(17) -0.0144(17) -0.0057(19) 
C3 0.023(2) 0.033(2) 0.035(2) -0.0077(19) -0.0116(17) -0.0060(19) 
C4 0.019(2) 0.022(2) 0.029(2) -0.0012(17) -0.0063(16) 0.0013(18) 
C5 0.0157(18) 0.0202(19) 0.0193(19) -0.0025(16) -0.0087(15) -0.0050(16) 
C6 0.0158(19) 0.0172(19) 0.025(2) -0.0046(16) -0.0021(15) -0.0045(16) 
C7 0.017(2) 0.031(2) 0.034(2) -0.0054(18) -0.0126(17) -0.0055(18) 
C8 0.0135(19) 0.027(2) 0.037(2) -0.0084(18) -0.0084(17) 0.0013(17) 
C9 0.020(2) 0.028(2) 0.034(2) -0.0176(18) -0.0025(17) -0.0005(18) 
 
_geom_special_details 
; 
 All esds (except the esd in the dihedral angle between two l.s. planes) 
 are estimated using the full covariance matrix.  The cell esds are taken 
 into account individually in the estimation of esds in distances, angles 
 and torsion angles; correlations between esds in cell parameters are only 
 used when they are defined by crystal symmetry.  An approximate (isotropic) 
 treatment of cell esds is used for estimating esds involving l.s. planes. 
; 
 
loop_ 
 _geom_bond_atom_site_label_1 
 _geom_bond_atom_site_label_2 
 _geom_bond_distance 
 _geom_bond_site_symmetry_2 
 _geom_bond_publ_flag 
Ni1 N3 1.877(3) . ? 
Ni1 N3 1.877(3) 2_566 ? 
Ni1 N1 1.883(3) . ? 
Ni1 N1 1.883(3) 2_566 ? 
Ni2 N2 2.015(3) . ? 
Ni2 O2W 2.034(3) . ? 
Ni2 N5 2.056(3) . ? 
Ni2 N7 2.058(3) . ? 
Ni2 O1 2.064(3) . ? 
Ni2 O1W 2.094(3) . ? 
O1W H1WA 0.848(10) . ? 
O1W H1WB 0.848(10) . ? 
O2W H2WA 0.846(10) . ? 
O2W H2WB 0.846(10) . ? 
O1 C1 1.411(5) . ? 
O1 H1O 0.843(10) . ? 
O2 N8 1.249(4) . ? 
O3 N8 1.245(4) . ? 
O4 N8 1.258(4) . ? 
O5 N9 1.206(4) . ? 
O6 N9 1.261(4) . ? 
O7 N9 1.207(5) . ? 
N1 C5 1.295(4) . ? 
N1 H1N 0.894(10) . ? 
N2 C5 1.327(4) . ? 
N2 C6 1.342(4) . ? 
N3 C6 1.296(4) . ? 
N3 H3N 0.894(10) . ? 
N4 C4 1.364(4) . ? 
N4 N5 1.384(4) . ? 
N4 C5 1.411(4) . ? 
N5 C2 1.330(4) . ? 
N6 C7 1.366(4) . ? 
N6 N7 1.373(4) . ? 
N6 C6 1.411(4) . ? 
N7 C9 1.318(5) . ? 
C1 H1A 0.9600 . ? 
C1 H1B 0.9600 . ? 
C1 H1C 0.9600 . ? 
C2 C3 1.405(5) . ? 
C2 H2 0.9300 . ? 
C3 C4 1.352(5) . ? 
C3 H3 0.9300 . ? 
C4 H4 0.9300 . ? 
C7 C8 1.358(5) . ? 
C7 H7 0.9300 . ? 
C8 C9 1.399(5) . ? 
C8 H8 0.9300 . ? 
C9 H9 0.9300 . ? 
 
loop_ 
 _geom_angle_atom_site_label_1 
 _geom_angle_atom_site_label_2 
 _geom_angle_atom_site_label_3 
 _geom_angle 
 _geom_angle_site_symmetry_1 
 _geom_angle_site_symmetry_3 
 _geom_angle_publ_flag 
N3 Ni1 N3 180.000(1) . 2_566 ? 
N3 Ni1 N1 90.89(13) . . ? 
N3 Ni1 N1 89.11(13) 2_566 . ? 
N3 Ni1 N1 89.11(13) . 2_566 ? 
N3 Ni1 N1 90.89(13) 2_566 2_566 ? 
N1 Ni1 N1 180.000(1) . 2_566 ? 
N2 Ni2 O2W 177.76(13) . . ? 
N2 Ni2 N5 78.09(11) . . ? 
O2W Ni2 N5 102.63(11) . . ? 
N2 Ni2 N7 78.52(11) . . ? 
O2W Ni2 N7 100.75(12) . . ? 
N5 Ni2 N7 156.61(12) . . ? 
N2 Ni2 O1 91.68(13) . . ? 
O2W Ni2 O1 86.21(14) . . ? 
N5 Ni2 O1 89.36(13) . . ? 
N7 Ni2 O1 91.38(13) . . ? 
N2 Ni2 O1W 92.20(12) . . ? 
O2W Ni2 O1W 89.93(12) . . ? 
N5 Ni2 O1W 89.66(12) . . ? 
N7 Ni2 O1W 91.18(11) . . ? 
O1 Ni2 O1W 175.71(12) . . ? 
Ni2 O1W H1WA 110(3) . . ? 
Ni2 O1W H1WB 108(3) . . ? 
H1WA O1W H1WB 110.2(17) . . ? 
Ni2 O2W H2WA 108(4) . . ? 
Ni2 O2W H2WB 117(3) . . ? 
H2WA O2W H2WB 110.4(18) . . ? 
C1 O1 Ni2 129.6(3) . . ? 
C1 O1 H1O 115(3) . . ? 
Ni2 O1 H1O 115(3) . . ? 
C5 N1 Ni1 126.5(2) . . ? 
C5 N1 H1N 112(2) . . ? 
Ni1 N1 H1N 122(2) . . ? 
C5 N2 C6 121.9(3) . . ? 
C5 N2 Ni2 119.4(2) . . ? 
C6 N2 Ni2 118.7(2) . . ? 
C6 N3 Ni1 127.3(2) . . ? 
C6 N3 H3N 113(3) . . ? 
Ni1 N3 H3N 119(3) . . ? 
C4 N4 N5 109.9(3) . . ? 
C4 N4 C5 131.6(3) . . ? 
N5 N4 C5 118.3(3) . . ? 
C2 N5 N4 105.2(3) . . ? 
C2 N5 Ni2 142.6(3) . . ? 
N4 N5 Ni2 112.1(2) . . ? 
C7 N6 N7 110.5(3) . . ? 
C7 N6 C6 130.3(3) . . ? 
N7 N6 C6 119.2(3) . . ? 
C9 N7 N6 105.4(3) . . ? 
C9 N7 Ni2 142.5(2) . . ? 
N6 N7 Ni2 111.9(2) . . ? 
O3 N8 O2 120.1(3) . . ? 
O3 N8 O4 119.6(3) . . ? 
O2 N8 O4 120.3(3) . . ? 
O5 N9 O7 118.5(4) . . ? 
O5 N9 O6 119.6(4) . . ? 
O7 N9 O6 121.6(3) . . ? 
O1 C1 H1A 109.5 . . ? 
O1 C1 H1B 109.5 . . ? 
H1A C1 H1B 109.5 . . ? 
O1 C1 H1C 109.5 . . ? 
H1A C1 H1C 109.5 . . ? 
H1B C1 H1C 109.5 . . ? 
N5 C2 C3 111.1(3) . . ? 
N5 C2 H2 124.5 . . ? 
C3 C2 H2 124.5 . . ? 
C4 C3 C2 105.7(3) . . ? 
C4 C3 H3 127.2 . . ? 
C2 C3 H3 127.2 . . ? 
C3 C4 N4 108.1(3) . . ? 
C3 C4 H4 126.0 . . ? 
N4 C4 H4 126.0 . . ? 
N1 C5 N2 127.2(3) . . ? 
N1 C5 N4 120.8(3) . . ? 
N2 C5 N4 111.9(3) . . ? 
N3 C6 N2 126.2(3) . . ? 
N3 C6 N6 122.1(3) . . ? 
N2 C6 N6 111.7(3) . . ? 
C8 C7 N6 107.0(3) . . ? 
C8 C7 H7 126.5 . . ? 
N6 C7 H7 126.5 . . ? 
C7 C8 C9 105.9(3) . . ? 
C7 C8 H8 127.1 . . ? 
C9 C8 H8 127.1 . . ? 
N7 C9 C8 111.2(3) . . ? 
N7 C9 H9 124.4 . . ? 
C8 C9 H9 124.4 . . ? 
 
loop_ 
 _geom_hbond_atom_site_label_D 
 _geom_hbond_atom_site_label_H 
 _geom_hbond_atom_site_label_A 
 _geom_hbond_distance_DH 
 _geom_hbond_distance_HA 
 _geom_hbond_distance_DA 
 _geom_hbond_angle_DHA 
 _geom_hbond_site_symmetry_A 
O1W H1WA O3  0.848(10) 1.889(12) 2.731(4) 172(3) 2_556 
O1W H1WB O2  0.848(10) 2.067(12) 2.912(4) 175(5) . 
O2W H2WA O6  0.846(10) 1.98(2) 2.783(4) 158(4) 2 
O2W H2WB O6  0.846(10) 1.961(18) 2.775(4) 161(4) . 
O1 H1O O7  0.843(10) 1.961(13) 2.795(5) 170(4) 1_565 
O1 H1O O5  0.843(10) 2.53(3) 3.190(6) 136(4) 1_565 
N1 H1N O4  0.894(10) 2.190(16) 3.050(4) 161(3) 2_466 
N3 H3N O4  0.894(10) 2.151(15) 3.027(4) 166(4) 1_655 
 
_diffrn_measured_fraction_theta_max    0.940 
_diffrn_reflns_theta_full              26.00 
_diffrn_measured_fraction_theta_full   0.940 
_refine_diff_density_max    0.882 
_refine_diff_density_min   -0.514 
_refine_diff_density_rms    0.087 

 
#_eof
#End of Crystallographic Information File
